# Supplementary material for: Atmospheric organochlorine pesticides and polychlorinated biphenyls in urban areas of Nepal: spatial variation, sources, temporal trends and long range transport potential
Source: Copernicus journal article supplement (doi:10.5194/acp-2017-448), 2017-05-19
Supplement: Supplementary file 1 [file acp-2017-448-supplement.pdf]

1 **Electronic Supplementary Materials for**

2

3 **Atmospheric organochlorine pesticides and polychlorinated biphenyls in urban areas of**  
4 **Nepal: spatial variation, sources, temporal trends and long range transport potential**

5

6

7 *Balram Pokhrel<sup>1,3,4</sup>, Ping Gong<sup>1,2</sup>, Xiaoping Wang<sup>\*1,2,3</sup>, Sanjay Nath Khanal<sup>4</sup>,*

8 *Jiao Ren<sup>1,3</sup>, Chuanfei Wang<sup>1,2</sup>, Shaopeng Gao<sup>1</sup>, Tandong Yao<sup>1,2</sup>*

9

10

11 1 Key Laboratory of Tibetan Environment Changes and Land Surface Processes, Institute of  
12 Tibetan Plateau Research, Chinese Academy of Sciences, Beijing 100101, China

13 2 CAS Center for Excellence in Tibetan Plateau Earth Sciences, Beijing 100101, China

14 3 University of Chinese Academy of Sciences, Beijing 100049, China School of Science

15 4 Kathmandu University, Dhulikhel, Nepal

16

17

18 \* Corresponding author.

19 (X. Wang)

20 E-mail: wangxp@itpcas.ac.cn

21 Tel: +86-10-84097120

22 Fax: +86-10-84097079

23

|             |                                                                                                                                                                       |         |
|-------------|-----------------------------------------------------------------------------------------------------------------------------------------------------------------------|---------|
| Text SI-1   | Description about the Study area                                                                                                                                      | Page 4  |
| Figure SI-1 | Wind field of over Nepal; a. Indian monsoon (June to September) b. Winter (October to January)                                                                        | Page 5  |
| Figure SI-2 | Monthly average precipitation (a) and temperature variation (b) in different cities                                                                                   | Page 6  |
| Table SI-1  | Details of PUF-PAS sampling sites in the three major cities of Nepal                                                                                                  | Page 7  |
| Table SI-2  | PUF-PAS sampling time                                                                                                                                                 | Page 8  |
| Text SI-2   | Chemical cleanup procedure                                                                                                                                            | Page 8  |
| Text SI-3   | Details about the gas chromatography temperature program                                                                                                              | Page 8  |
| Table SI-3  | Data of Field blanks and Method detection limits (MDL) ng/PAS                                                                                                         | Page 9  |
| Text SI-4   | Details about PUF-disk and Sampling rate                                                                                                                              | Page 10 |
| Table SI-4  | Site specific sampling rate                                                                                                                                           | Page 11 |
| Table SI-5a | Site specific concentrations (pg/m <sup>3</sup> ) of OCPs in different urban sites of Kathmandu                                                                       | Page 12 |
| Table SI-5b | Site specific concentrations (pg/m <sup>3</sup> ) of OCPs in different urban sites of Pokhara                                                                         | Page 14 |
| Table SI-5c | Site specific concentrations (pg/m <sup>3</sup> ) of OCPs in different urban sites of Hetauda                                                                         | Page 17 |
| Table SI-6a | Site specific concentrations (pg/m <sup>3</sup> ) of PCBs in different urban sites of Kathmandu                                                                       | Page 18 |
| Table SI-6b | Site specific concentrations (pg/m <sup>3</sup> ) of PCBs in different urban sites of Pokhara                                                                         | Page 20 |
| Table SI-6c | Site specific concentrations (pg/m <sup>3</sup> ) of OCPs in different urban sites of Hetauda                                                                         | Page 22 |
| Table SI-7  | Comparison of current levels (pg/m <sup>3</sup> ) of various POPs with different tropical/subtropical urban sites                                                     | Page 23 |
| Table SI-8  | Range and average (pg/m <sup>3</sup> ) with Highest to lowest concentration ratio (H/L) of different isomers/congeners                                                | Page 24 |
| Figure SI-3 | Box and whisker plot to show distribution of different isomers of DDT and its metabolites in Kathmandu, Pokhara and Hetauda                                           | Page 25 |
| Figure SI-4 | Isomers/ metabolites ratios of selected OCPs to predict source type                                                                                                   | Page 25 |
| Figure SI-5 | Box and whisker plot to show distribution of different isomers of HCH and endosulfan in Kathmandu, Pokhara and Hetauda                                                | Page 26 |
| Figure SI-6 | Box and whisker plot to show distribution of different congeners of PCBs in Kathmandu, Pokhara and Hetauda                                                            | Page 26 |
| Table SI-9  | P-values (one-way ANOVA) for significant variation in levels of different POPs in different sites                                                                     | Page 27 |
| Table SI-10 | Significant differences (P<0.05, Tukey's Test) in OCPs concentrations among the sites in Kathmandu                                                                    | Page 28 |
| Table SI-11 | Significant differences (P<0.05, Tukey's post hoc Test) in OCPs concentrations among the sites in Hetauda                                                             | Page 28 |
| Figure SI-7 | Atmospheric level of OCPs in different land cover types in Pokhara; (P1-Cropland; P2-Vegetable production and Market area; P3-Industrial area; and P4- Tourist place) | Page 29 |
| Figure SI-8 | Atmospheric level of OCPs in different land cover types in Hetauda; (H1- Crop Land; H2-Vegetable production /residential area; H3-                                    | Page 30 |

|              |                                                                                                                                                                      |         |
|--------------|----------------------------------------------------------------------------------------------------------------------------------------------------------------------|---------|
|              | Industrial area)                                                                                                                                                     |         |
| Figure SI-9  | Seasonality of DDTs and HCHs in Kathmandu city (K1: Cropland, K3: Industrial area, K4: Tourist area, K5: Residential area, K6: mix of farm land and industrial area) | Page 31 |
| Figure SI-10 | Seasonality of DDTs and HCHs in Pokhara city (P1: Cropland, P3: Industrial area, P4: Tourist area)                                                                   | Page 32 |
| Figure SI-11 | Seasonality of DDTs and HCHs in Hetauda (H1: Cropland, H3: Industrial area)                                                                                          | Page 33 |
| Figure SI-12 | Seasonal variation of HCB in 3 cities of Nepal                                                                                                                       | Page 34 |
| Text SI-5    | Estimation of Long range transport potential                                                                                                                         | Page 35 |
| Table SI-12  | Temperature dependent Henry's law constant and vapor pressure with Rate constant of hydroxyl radical reaction at 25 °C                                               | Page 36 |
| Table SI-13  | Calculated values of degradation and deposition rates ( $s^{-1}$ ) based on field temperature and precipitation                                                      | Page 37 |
| Table SI-14  | Comparison of characteristic travel distance (CTD) km, in current study areas with global and other specified regions                                                | Page 39 |
| Text SI-6    | Uncertainties of CTD                                                                                                                                                 | Page 40 |
| Text SI-7    | Generation of forward trajectories                                                                                                                                   | Page 40 |
| Figure SI-13 | Clusters of forward trajectories                                                                                                                                     | Page 40 |
| References   |                                                                                                                                                                      | Page 41 |

24

25

26 **Text SI-1. Description about the Study area**

27

28 Kathmandu (1350m asl) located in mountain valley is the capital city of Nepal, with very dense  
29 population (an area of 642 sq. km, population =2.5 million,). Agriculture, industry (instant food,  
30 clothes, bricks), and tourism are the major economy of Kathmandu. Pokhara (750-1050m asl) is  
31 second largest city after Kathmandu, covering an area of 225 sq. km with a population of 0.3  
32 million. Hetauda (100m) is relatively small with 135,475 populations. Different from Kathmandu,  
33 Pokhara and Hetauda are agricultural cities, with large area of crop and vegetable production  
34 place and market. Climate of these 3 cities are commonly influenced by the Indian monsoon in  
35 summer and westerlies (south branch) in winter. Summer is warm and wet particularly in July-  
36 August but winter is dry and cold. Among the cities, Hetauda is warmest followed by Pokhara  
37 and Kathmandu, whereas annual rainfall follows the order Pokhara (~3900mm) >Hetauda  
38 (~2250mm) > Kathmandu (1450mm).

39

40

41

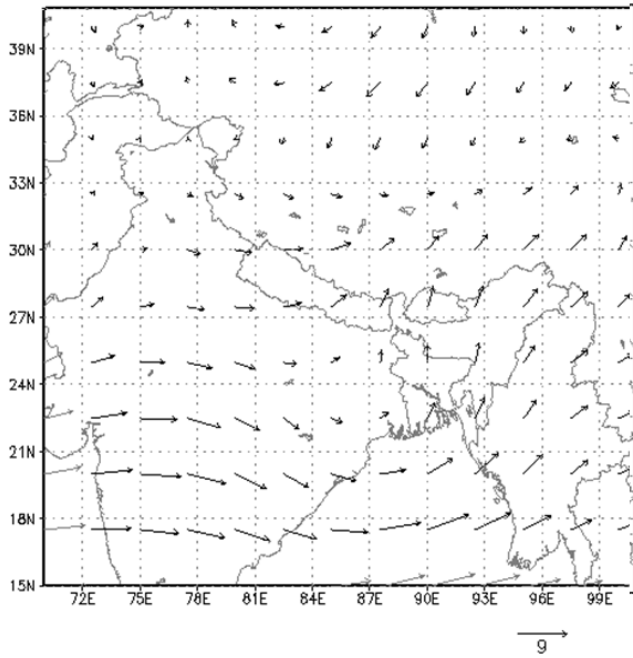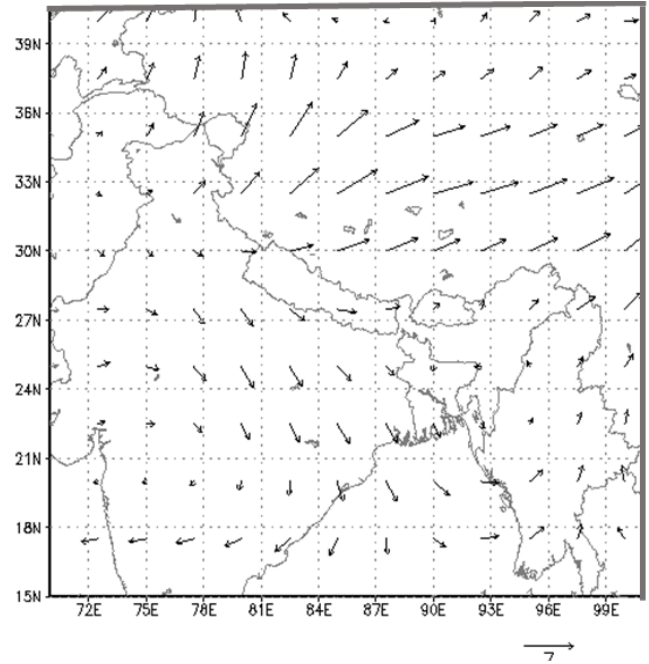

42

43

(a)

(b)

44 **Figure SI-1. Wind field of over Nepal; a. Indian monsoon (June to September) b. Winter**  
45 **(October to January)**

46

47  
48  
49  
50  
51  
52  
53  
54  
55  
56  
57

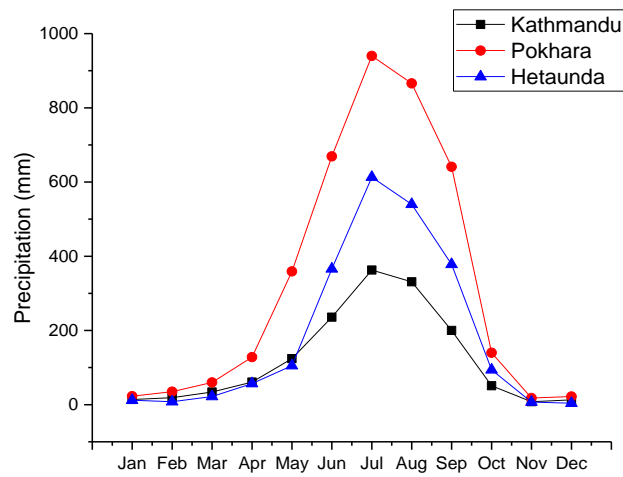

(a)

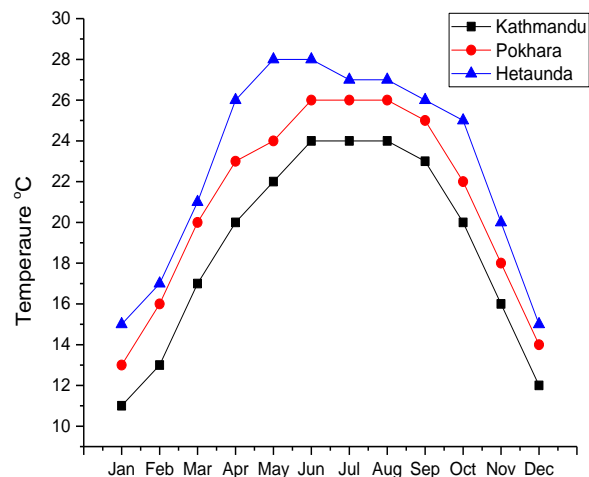

(b)

58  
59  
60

**Figure SI-2. Monthly average of (a) precipitation and (b) temperature variation in 3 cities of Nepal**

61 **Table SI-1. Details of PUF-PAS sampling sites in the three major cities of Nepal**

62

| PAS                                   | Land type                          | Latitude N      | Longitude E     | Altitude | Site description                                                             |
|---------------------------------------|------------------------------------|-----------------|-----------------|----------|------------------------------------------------------------------------------|
| <b>Kathmandu (27° 42'N; 85° 18'E)</b> |                                    |                 |                 |          |                                                                              |
| K1                                    | Cropland                           | 27 ° 36' 38.92" | 85 ° 21' 30.79" | 1433     | Sub-urban site, south of the Kathmandu valley, produce maize, rice           |
| K2                                    | Market area                        | 27 ° 42' 12.42" | 85 ° 18' 38.34" | 1311     | Major vegetable market of the capital city                                   |
| K3                                    | Industrial area                    | 27 ° 43' 53.69" | 85 ° 17' 54.28" | 1315     | Industrial area in the north of Kathmandu city                               |
| K4                                    | Tourist                            | 27 ° 42' 35.68" | 85 ° 20' 43.87" | 1318     | A famous religious place for Hindu people, one of UNESCO-world heritage site |
| K5                                    | Residential                        | 27 ° 41' 13.45" | 85 ° 18' 8.71"  | 1293     | Residential area in Kathmandu                                                |
| K6                                    | Farm/Industrial                    | 27 ° 40' 12.11" | 85 ° 25' 31.73" | 1348     | Eastern part of Kathmandu valley, mix of farm land and industrial plants     |
| <b>Pokhara (28°15'N; 83°58'E)</b>     |                                    |                 |                 |          |                                                                              |
| P1                                    | Cropland                           | 28°16'52.51"    | 83°55'44.17"    | 1065     | Suburban region, famous for maize, paddy production                          |
| P2                                    | Vegetable production area (market) | 28°13'39.01"    | 83°58'56.18"    | 871      | Major market area on one side, vegetable production area on the other side   |
| P3                                    | Industrial area                    | 28°12'51.39"    | 84°00'37.58"    | 813      | Industrial area for making chocolate and noodles                             |
| P4                                    | Tourist place                      | 28°12'47.35"    | 83°57'41.88"    | 781      | East bank of Phewa lake, a famous tourist destination                        |
| <b>Hetauda (27°25'N; 85°02'E)</b>     |                                    |                 |                 |          |                                                                              |
| H1                                    | Cropland                           | 27 ° 23' 26.88" | 85 ° 02' 38.64" | 512      | A rural village with seasonal farming mostly rice, wheat and mustard         |
| H2                                    | Vegetable production area          | 27 ° 25' 8.40"  | 85 ° 02' 28.20" | 459      | Vegetable production area and market, mainly for commercial purpose          |
| H3                                    | Industrial area                    | 27 ° 24' 6.78"  | 85 ° 01' 32.34" | 436      | Industrial area for instant food                                             |

63

64

65

66 **Table SI-2. PUF-PAS sampling time**

67

| Kathmandu and Pokhara (2014-08 to 2015-08) |                          |            | Hetaunda (2015-11 to 2016-11) 68 |                          |            |
|--------------------------------------------|--------------------------|------------|----------------------------------|--------------------------|------------|
| SN                                         | Period                   | total days | SN                               | Period                   | total days |
| 1                                          | 2014-08-19 to 2014-10-12 | 55         | 1                                | 2015-11-06 to 2016-01-06 | 62         |
| 2                                          | 2014-10-12 to 2014-12-11 | 61         | 2                                | 2016-01-06 to 2016-03-05 | 59         |
| 3                                          | 2014-12-11 to 2015-02-03 | 65         | 3                                | 2016-03-05 to 2016-05-07 | 64         |
| 4                                          | 2015-02-03 to 2015-04-18 | 65         | 4                                | 2016-05-07 to 2016-07-09 | 63         |
| 5                                          | 2015-04-18 to 2015-06-16 | 57         | 5                                | 2016-07-09 to 2016-09-10 | 63         |
| 6                                          | 2015-06-13 to 2015-08-15 | 64         | 6                                | 2016-09-10 to 2016-11-10 | 62         |

69 **Text SI-2. Chemical cleanup procedure**

70

71 Each extract was concentrated using rotary evaporator and solvent exchanged to hexane. The  
 72 concentrated extract was loaded on the top of a chromatography column (from the top to bottom: 1 cm  
 73 of anhydrous Na<sub>2</sub>SO<sub>4</sub>, 2g activated alumina, and 3g activated silica gel), and eluted with 30 mL mixture  
 74 of DCM and hexane (1:1). The volume of eluate was reduced under gentle stream of high purity  
 75 nitrogen to about 1ml and added 20 µl internal standard containing a known quantity of  
 76 pentachloronitrobenzene (PCNB) and decachlorobiphenyl (PCB-209). Finally, the volume was reduced  
 77 to 100 µl under gentle stream of nitrogen before analysis.

78 **Text SI-3. Details about the gas chromatography temperature program**

79

80 Helium was used as the carrier gas at 1 mL min<sup>-1</sup> under constant-flow mode. The oven temperature  
 81 began at 100 °C for 2 min, ramped up at a rate of 20 °C min<sup>-1</sup> to 140 °C, at 4 °C min<sup>-1</sup> to 200 °C (10 min  
 82 hold time), then at 4 °C min<sup>-1</sup> to 310 °C and held for 5 min.

83



84 **Table SI-3. Data of Field blanks and Method detection limits (MDL) ng/PAS**

85

|                  | Kathmandu |       |       |       |       | Pokhara |       |       | Hetauda |       |       | MDL* |      |      |
|------------------|-----------|-------|-------|-------|-------|---------|-------|-------|---------|-------|-------|------|------|------|
|                  | Kfb-1     | Kfb-2 | Kfb-3 | Kfb-4 | Kfb-5 | Pfb-1   | Pfb-2 | Pfb-3 | Hfb-1   | Hfb-2 | Hfb-3 | Ktm  | Pkr  | Het  |
| <i>o,p'</i> -DDT | 0.14      | ND    | ND    | ND    | ND    | ND      | ND    | 0.01  | ND      | ND    | ND    | 0.11 | 0.01 | 0.01 |
| <i>p,p'</i> -DDT | 0.02      | ND    | ND    | ND    | ND    | ND      | ND    | 0.06  | 0.02    | 0.01  | 0.01  | 0.02 | 0.06 | 0.02 |
| <i>o,p'</i> -DDE | 0.17      | ND    | ND    | ND    | ND    | ND      | ND    | ND    | 0.02    | 0.01  | 0.02  | 0.14 | 0.18 | 0.03 |
| <i>p,p'</i> -DDE | 1.53      | ND    | ND    | 0.01  | 0.03  | 0.02    | 0.04  | 0.06  | 0.02    | 0.01  | 0.01  | 1.27 | 0.06 | 0.03 |
| <i>o,p'</i> -DDD | ND        | ND    | ND    | ND    | ND    | ND      | ND    | ND    | ND      | ND    | ND    | 0.22 | 0.22 | 0.01 |
| <i>p,p'</i> -DDD | ND        | ND    | ND    | ND    | ND    | ND      | ND    | ND    | ND      | ND    | ND    | 0.03 | 0.03 | 0.01 |
| $\alpha$ -HCH    | 0.05      | ND    | ND    | 0.01  | 0.02  | 0.02    | 0.01  | ND    | 0.02    | 0.07  | ND    | 0.04 | 0.02 | 0.13 |
| $\beta$ -HCH     | 0.31      | 0.11  | ND    | 0.06  | 0.02  | 0.06    | 0.04  | 0.04  | ND      | ND    | ND    | 0.27 | 0.07 | 0.22 |
| $\gamma$ -HCH    | 0.19      | ND    | ND    | 0.01  | 0.06  | 0.03    | 0.01  | 0.01  | ND      | 0.01  | 0.02  | 0.16 | 0.03 | 0.01 |
| $\delta$ -HCH    | 0.02      | ND    | 0     | ND    | ND    | ND      | ND    | ND    | ND      | ND    | ND    | 0.02 | 0.01 | 0.03 |
| HCB              | 0.3       | 0.08  | 0.04  | 0.1   | 0.18  | 0.3     | 0.06  | 0.08  | 0.06    | 0.13  | 0.04  | 0.48 | 0.51 | 0.51 |
| $\alpha$ -endo   | 0.09      | 0.02  | ND    | ND    | 0.03  | ND      | ND    | ND    | ND      | ND    | 0.02  | 0.08 | 0.06 | 0.06 |
| $\beta$ -endo    | 1.61      | ND    | ND    | ND    | ND    | 0.08    | ND    | ND    | 0.05    | ND    | 0.19  | 1.34 | 0.07 | 0.07 |
| Hept             | ND        | ND    | ND    | ND    | ND    | ND      | ND    | ND    | ND      | ND    | ND    | 0.12 | 0.12 | 0.12 |
| Hepx             | ND        | ND    | ND    | ND    | ND    | ND      | ND    | ND    | ND      | ND    | ND    | 0.11 | 0.11 | 0.11 |
| PCB-28           | 0.05      | ND    | ND    | 0.01  | 0.01  | 0.01    | ND    | 0.01  | ND      | ND    | ND    | 0.04 | 0.02 | 0.02 |
| PCB-52           | ND        | ND    | ND    | ND    | ND    | ND      | ND    | ND    | ND      | ND    | ND    | 0.08 | 0.08 | 0.08 |
| PCB-101          | 0.07      | ND    | ND    | ND    | ND    | ND      | ND    | ND    | ND      | ND    | 0.35  | 0.11 | 0.11 | 0.11 |
| PCB-153          | ND        | ND    | ND    | ND    | ND    | ND      | ND    | ND    | ND      | ND    | 0.06  | 0.11 | 0.11 | 0.11 |
| PCB-138          | ND        | ND    | ND    | ND    | ND    | ND      | ND    | ND    | ND      | ND    | ND    | 0.08 | 0.08 | 0.08 |
| PCB-180          | ND        | ND    | ND    | ND    | ND    | ND      | ND    | ND    | ND      | ND    | 0.01  | 0.13 | 0.13 | 0.13 |

86 \*MDL Method detection limit

87 **Text SI-4. Details about PUF-disk and Sampling rate**

88 **a. Sample holder and sampler**

89 **Dimensions of PUF-Disks:**

90 Polyurethane foam disk used for air sampling had the following dimensions: Diameter (d) = 135.5  
91 cm, thickness (h) = 1.3 cm; mass (m) = 3.78 g; area (A) = 341.4 cm<sup>2</sup> (ND34 m<sup>2</sup>); Volume (V) =  
92 186.1 cm<sup>3</sup> (ND00186 m<sup>3</sup>); Density (δ) = 20305.6 g/m<sup>3</sup>.

93 A chamber to house the PUF-disk was prepared connecting two stainless steel bowls by means of  
94 hinges and a lock. It was so designed that it would protect the PUF-disk from direct precipitation,  
95 sunlight and coarse particle deposition and allow ambient air to pass the through chamber from  
96 the gap between bowls and small holes at the base of bottom bowl. This design of chamber has  
97 been successfully calibrated and used in numerous previous studies (Shoeib & Harner, 2002a;  
98 Harner et al., 2004; Pozo et al., 2006; Harner et al., 2006 ). PUF disks samplers were pre-cleaned  
99 by Soxhlet extraction using dichloromethane (DCM) for 24 h and dried for 24h in a clean  
100 desiccator under reduced pressure. Before sending for field deployment, the PUF-disks were  
101 spiked with four performance reference compounds (PRCs, PCB-30, -54, -104, -188), that were  
102 used to determine the site-specific sampling rates (Pozo et al., 2009). After applying DCs, each  
103 PUF-disks was wrapped with clean aluminum foil packed into a plastic bag and stored in a tin  
104 container. Five field blanks for Kathmandu, 3 for Pokhara and 3 for Hetauda were prepared to  
105 inspect the possible contamination during handling, storage, and transport.

106 **b. Calculation of Sampling Rate “R”**

107 To assess the site specific sampling rates, PRCs were added to each PUF disks prior to their  
108 deployment. Loss of DCs during sampling period was quantified based on individual recoveries.  
109 Ideally, recoveries between 20 and 80% of their initial amount would indicate the linear sampling  
110 of individual PAS. This requires DCs with a wide range of octanol-air partition coefficients (K<sub>OA</sub>).  
111 By measuring the loss of DCs during sampling period site-specific air sampling rate ‘R’ can be  
112 estimated using the following relationship given by Moeckel et al., (2009)

113 
$$R = \frac{-\ln\left(\frac{C_{DC}^{corr}}{C_{DC,0}}\right) \cdot K_{PAS-A} \cdot \rho_{PAS} \cdot V}{t} \quad (1)$$

114  
115 
$$\text{With } C_{DC}^{corr} = \frac{C_{DC}}{\frac{C_{DC-stable}}{C_{DC-stable,0}}}$$

116  
117 
$$K_{PASA} = 10^{0.6366 \log K_{OA} - 3.1774} \quad (2)$$

118  
119 Where  $C_{DC}$  and  $C_{DC-stable}$  are the concentrations of DC and DC-stable at the end of the deployment  
120 period, respectively (ng sample<sup>-1</sup>).  $K_{PAS-A}$  is the chemical’s PAS-air partition coefficient with units  
121 of m<sup>3</sup> g<sup>-1</sup> and it can be calculated according to the regression (eq 2) given by Shoeib and Harner,  
122 (2002),  $\rho_{PAS}$  is the PAS bulk density (g m<sup>-3</sup>),  $V$  is the volume of the PAS (m<sup>3</sup>), and  $t$  is the  
123 deployment period in days. PCB-188 is used as DC-stable for correcting the losses of DCs. Only  
124 DCs that have recoveries within the desired range of between 20% and 80% should be used to  
125 estimate uptake rates.

126 **Table SI-4. Site specific sampling rate**  
 127

| Sampling period | Aug-Oct    |            | Oct-Dec    |            | Dec-Feb    |            | Feb-Apr    |            | Apr-Jun    |            | Jun-Aug    |            |
|-----------------|------------|------------|------------|------------|------------|------------|------------|------------|------------|------------|------------|------------|
|                 | 55 days    |            | 61 days    |            | 65 days    |            | 65 days    |            | 57 days    |            | 64 days    |            |
| KATHMANDU       | I          | II         | I          | I          |
| K1              | 4.4        | 3.9        | 4.6        | 5.2        | 5.2        | 5.3        | 4.5        | 4.7        | 4.3        | 4.4        | 3.3        | 3.4        |
| K2              | 4.3        | 4.4        | 4.9        | 4.6        | 5.2        | 4.6        | 4.7        | 4.3        | 5.5        | NA         | 3.4        | 4.1        |
| K3              | 3          | 4.2        | 5.2        | 3.2        | 4          | 3.5        | 3.4        | 3.8        | 4          | 4.1        | 3.1        | 2.3        |
| K4              | 3.9        | 3.7        | 3.4        | 4.2        | 4.2        | NA         | 2.9        | 4.4        | 3          | NA         | 2.8        | 2.8        |
| K5              | 4.4        | 4.6        | 5          | 3.9        | 5.7        | 6.1        | 3.9        | 4.7        | 4.7        | 4.8        | 3.1        | 3.4        |
| K6              | 4.8        | 4          | 4.3        | 4.3        | 5.9        | 5.4        | 5.4        | 5          | 4.7        | 4.6        | 3.8        | 4.3        |
| Average         | <b>4.1</b> | <b>4.1</b> | <b>4.6</b> | <b>4.2</b> | <b>5</b>   | <b>4.9</b> | <b>4.1</b> | <b>4.5</b> | <b>4.4</b> | <b>4.5</b> | <b>3.3</b> | <b>3.4</b> |
| Std. Dev        | <b>0.6</b> | <b>0.3</b> | <b>0.7</b> | <b>0.7</b> | <b>0.8</b> | <b>1</b>   | <b>0.9</b> | <b>0.4</b> | <b>0.8</b> | <b>0.3</b> | <b>0.3</b> | <b>0.8</b> |
| POKHARA         |            |            |            |            |            |            |            |            |            |            |            |            |
| P1              | 4.7        | 3.7        | 3.6        | 4.1        | 3.9        | 4          | 3.2        | 3.6        | 4.7        | 2.6        | 2.3        | 4.8        |
| P3              | 5.7        | 5.9        | 6.3        | NA         | 3.2        | 3.3        | 4.6        | 3.8        | 4.7        | 4.3        | 4          | 4.5        |
| P2              | 6.8        | 5.9        | 3.3        | 3.1        | 2.3        | 2.2        | 2.8        | 2.1        | 5.6        | 5          | 6.1        | 4.9        |
| P4              | 4.8        | 6.4        | 4.9        | 4.8        | 4.4        | 3.7        | 4.2        | 3.5        | 4.9        | 3.7        | 3.9        | 5.7        |
| Average         | <b>5.5</b> | <b>5.5</b> | <b>4.5</b> | <b>4</b>   | <b>3.4</b> | <b>3.3</b> | <b>3.7</b> | <b>3.2</b> | <b>5</b>   | <b>3.9</b> | <b>4.1</b> | <b>5</b>   |
| Std. Dev        | <b>1</b>   | <b>1.2</b> | <b>1.4</b> | <b>0.8</b> | <b>0.9</b> | <b>0.8</b> | <b>0.8</b> | <b>0.8</b> | <b>0.4</b> | <b>1</b>   | <b>1.6</b> | <b>0.5</b> |
| HETAUDA         |            |            |            |            |            |            |            |            |            |            |            |            |
|                 | 62 days    |            | 62 days    |            | 59 days    |            | 64 days    |            | 64 days    |            | 63 days    |            |
| H1              | NA         | NA         | 2.1        | 3.9        | 2.7        | 3.2        | 4.7        | 3.7        | 4.8        | 4.9        | 3.2        | 2.8        |
| H2              | NA         | NA         | 3          | 2.7        | 2.8        | 3.1        | 2.2        | 3          | 3.8        | 3.7        | 3.6        | 4.1        |
| H3              | NA         | NA         | 2.5        | 2.4        | 3.6        | 4.8        | 2.8        | 2.7        | 3.4        | 2.5        | 2.4        | 4.9        |
| Average         | <b>NA</b>  | <b>NA</b>  | <b>2.5</b> | <b>3</b>   | <b>3</b>   | <b>3.7</b> | <b>3.2</b> | <b>3.1</b> | <b>4</b>   | <b>3.7</b> | <b>3.1</b> | <b>3.9</b> |
| Std. Dev        | <b>NA</b>  | <b>NA</b>  | <b>0.5</b> | <b>0.8</b> | <b>0.5</b> | <b>0.9</b> | <b>1.3</b> | <b>0.5</b> | <b>0.7</b> | <b>1.2</b> | <b>0.6</b> | <b>1</b>   |

128

129 **Table SI-5a. Site specific concentrations (pg/m<sup>3</sup>) of OCPs in different urban sites of Kathmandu**

130

| Land type           | Seasons         | Sampling | <i>o,p'</i> -<br>DDT | <i>p,p'</i> -<br>DDT | <i>o,p'</i> -<br>DDE | <i>p,p'</i> -<br>DDE | <i>o,p'</i> -<br>DDD | <i>p,p'</i> -<br>DDD | $\alpha$ -<br>HCH | $\beta$ -<br>HCH | $\gamma$ -<br>HCH | $\delta$ -<br>HCH | HCB | $\alpha$ -<br>endo | $\beta$ -<br>endo | Hept | Hepx |     |
|---------------------|-----------------|----------|----------------------|----------------------|----------------------|----------------------|----------------------|----------------------|-------------------|------------------|-------------------|-------------------|-----|--------------------|-------------------|------|------|-----|
| Crop Land           | Winter          | 1        | I                    | 7.7                  | 4.7                  | 1.8                  | 8.0                  | 0.5                  | 0.7               | 4.3              | 2.2               | 5.5               | 1.0 | 10.8               | 3.0               | 3.1  | BDL  | BDL |
|                     |                 |          | II                   | 7.4                  | 5.0                  | 1.5                  | 5.4                  | 0.4                  | 0.7               | 3.6              | 2.2               | 4.6               | 2.4 | 12.8               | 1.5               | 9.3  | BDL  | BDL |
|                     |                 | 2        | I                    | 5.2                  | 3.0                  | 0.8                  | 4.4                  | BDL                  | 0.9               | 3.4              | 0.3               | 4.9               | 2.0 | 13.0               | BDL               | 2.3  | BDL  | BDL |
|                     |                 |          | II                   | 4.2                  | 2.7                  | 0.5                  | 3.7                  | BDL                  | 0.3               | 2.0              | 0.7               | 2.7               | 0.9 | 12.4               | BDL               | 2.4  | 0.1  | BDL |
|                     | Pre-<br>monsoon | 3        | I                    | 24.5                 | 24.6                 | 3.0                  | 13.0                 | BDL                  | 1.1               | 4.5              | 1.8               | 12.4              | BDL | 7.8                | 0.9               | 6.5  | BDL  | BDL |
|                     |                 |          | II                   | 22.0                 | 16.1                 | 2.7                  | 8.4                  | BDL                  | 0.7               | 2.7              | 1.1               | 8.8               | BDL | 7.8                | BDL               | 1.2  | BDL  | BDL |
|                     |                 | 4        | I                    | 58.3                 | 69.0                 | 2.7                  | 24.4                 | 1.0                  | 2.3               | 6.3              | 2.4               | 11.6              | 2.5 | 10.3               | 2.7               | 8.0  | BDL  | BDL |
|                     |                 |          | II                   | 52.2                 | 62.8                 | 3.9                  | 19.9                 | 1.0                  | 2.2               | 5.2              | 1.3               | 9.3               | 1.2 | 10.8               | BDL               | BDL  | BDL  | BDL |
|                     | Monsoon         | 5        | I                    | 37.3                 | 38.3                 | 2.0                  | 12.5                 | 0.7                  | 1.2               | 7.1              | 1.4               | 8.2               | 0.9 | 7.9                | 1.3               | 6.6  | BDL  | BDL |
|                     |                 |          | II                   | 44.1                 | 45.9                 | 2.6                  | 22.4                 | 1.1                  | 1.8               | 10.3             | 1.5               | 9.8               | 0.8 | 13.5               | BDL               | BDL  | BDL  | BDL |
|                     |                 | 6        | I                    | 22.8                 | 18.6                 | 2.6                  | 14.3                 | 0.5                  | 1.2               | 7.0              | 1.8               | 8.5               | 2.7 | 14.9               | 2.0               | 4.7  | BDL  | BDL |
|                     |                 |          | II                   | 26.4                 | 22.7                 | 2.0                  | 14.5                 | BDL                  | 0.7               | 6.0              | 2.4               | 4.8               | 1.4 | 11.7               | BDL               | 9.7  | BDL  | BDL |
| Vegetable<br>Market | Winter          | 1        | I                    | 11.2                 | 19.0                 | 1.6                  | 25.4                 | 0.6                  | 3.0               | 8.7              | 2.2               | 18.6              | 2.2 | 10.4               | BDL               | 7.2  | 0.2  | BDL |
|                     |                 |          | II                   | 12.7                 | 21.2                 | 1.3                  | 28.2                 | 0.6                  | 3.4               | 6.7              | 2.2               | 19.6              | 0.5 | 17.0               | BDL               | 7.8  | 0.4  | BDL |
|                     |                 | 2        | I                    | 6.1                  | 14.1                 | 1.3                  | 24.1                 | 1.9                  | 4.0               | 3.9              | 2.7               | 13.6              | 0.4 | 24.4               | 1.8               | 12.3 | 0.0  | BDL |
|                     |                 |          | II                   | 6.1                  | 11.1                 | 1.6                  | 24.9                 | 1.5                  | 3.9               | 5.1              | 1.5               | 14.6              | BDL | 22.4               | BDL               | 4.0  | 0.4  | BDL |
|                     | Pre-<br>monsoon | 3        | I                    | 45.4                 | 97.6                 | 8.7                  | 106.1                | 3.3                  | 10.0              | 9.3              | 3.6               | 43.6              | 1.3 | 13.8               | BDL               | 11.7 | 0.9  | BDL |
|                     |                 |          | II                   | 49.3                 | 123.9                | 7.3                  | 118.2                | 4.1                  | 12.8              | 11.2             | 6.9               | 43.8              | 2.3 | 13.5               | 6.4               | 20.2 | 0.8  | BDL |
|                     |                 | 4        | I                    | 46.3                 | 91.2                 | 5.7                  | 61.6                 | 2.3                  | 5.8               | 4.7              | 2.9               | 27.0              | 2.3 | 6.7                | 5.9               | 3.4  | 0.5  | BDL |
|                     |                 |          | II                   | 83.7                 | 137.4                | 10.0                 | 176.4                | 4.3                  | 9.4               | 16.3             | 5.9               | 152.9             | 4.5 | 13.8               | 13.5              | 32.7 | 0.9  | BDL |
|                     | Monsoon         | 5        | I                    | 70.5                 | 105.6                | 10.9                 | 137.8                | 3.5                  | 7.0               | 11.3             | 6.7               | 114.0             | 5.6 | 12.3               | 6.8               | 4.5  | 0.9  | BDL |
|                     |                 |          | II                   | 45.5                 | 98.8                 | 3.5                  | 87.1                 | 2.4                  | 5.9               | 11.0             | 3.8               | 20.4              | 6.6 | 15.0               | 3.7               | 16.7 | 0.7  | BDL |
|                     |                 | 6        | I                    | 46.4                 | 99.0                 | 5.0                  | 91.7                 | 2.8                  | 6.4               | 13.0             | 4.3               | 25.0              | 8.5 | 12.1               | BDL               | 16.4 | 1.0  | BDL |
|                     |                 |          | II                   | 46.4                 | 99.0                 | 5.0                  | 91.7                 | 2.8                  | 6.4               | 13.0             | 4.3               | 25.0              | 8.5 | 12.1               | BDL               | 16.4 | 1.0  | BDL |
| Industrial          | Winter          | 1        | I                    | 5.0                  | 5.6                  | 1.5                  | 11.0                 | 0.3                  | 1.8               | 3.7              | 1.2               | 6.7               | BDL | 66.6               | BDL               | 2.3  | BDL  | BDL |
|                     |                 |          | II                   | 3.4                  | 3.7                  | 0.6                  | 6.2                  | 0.2                  | 0.8               | 3.0              | 1.1               | 4.7               | BDL | 46.1               | BDL               | 1.0  | BDL  | BDL |
|                     |                 | 2        | I                    | 5.9                  | 21.9                 | 1.4                  | 13.9                 | 0.5                  | 3.5               | 5.0              | 2.9               | 11.7              | 2.7 | 148.6              | 1.5               | 3.1  | 0.7  | BDL |
|                     |                 |          | II                   | 5.9                  | 22.1                 | 1.8                  | 15.9                 | 0.5                  | 4.0               | 5.6              | 1.3               | 16.7              | BDL | 223.8              | 3.5               | 2.8  | 0.4  | BDL |
|                     | Pre-            | 3        | I                    | 17.0                 | 19.0                 | 1.8                  | 17.8                 | 0.7                  | 2.6               | 5.7              | 2.1               | 12.6              | 1.3 | 65.8               | 2.2               | 4.1  | 0.2  | BDL |
|                     |                 |          | II                   | 17.0                 | 19.0                 | 1.8                  | 17.8                 | 0.7                  | 2.6               | 5.7              | 2.1               | 12.6              | 1.3 | 65.8               | 2.2               | 4.1  | 0.2  | BDL |

|                         |         |   |    |      |      |     |      |     |     |      |      |      |     |       |     |      |     |     |
|-------------------------|---------|---|----|------|------|-----|------|-----|-----|------|------|------|-----|-------|-----|------|-----|-----|
|                         | monsoon |   | II | 14.1 | 14.3 | 2.4 | 15.9 | 0.5 | 2.2 | 5.2  | 1.5  | 15.1 | 1.4 | 58.2  | 2.2 | 5.9  | 0.3 | BDL |
|                         |         | 4 | I  | 45.1 | 54.6 | 6.6 | 37.9 | 1.3 | 3.1 | 7.3  | 2.6  | 15.2 | 3.5 | 18.6  | 4.4 | 2.8  | 0.3 | BDL |
|                         |         |   | II | 36.7 | 47.8 | 4.2 | 27.5 | 1.0 | 2.8 | 5.5  | 2.4  | 10.7 | 3.7 | 12.8  | BDL | 4.9  | BDL | BDL |
|                         | Monsoon | 5 | I  | 36.0 | 43.4 | 4.4 | 43.6 | 1.5 | 2.9 | 9.0  | 3.6  | 18.5 | 3.4 | 37.5  | 2.0 | 8.5  | 0.6 | BDL |
|                         |         |   | II | 55.5 | 67.0 | 6.9 | 69.7 | 2.3 | 7.5 | 16.9 | 6.9  | 34.0 | 3.6 | 98.3  | 2.6 | 10.1 | BDL | BDL |
|                         |         | 6 | I  | 14.8 | 18.1 | 4.7 | 27.3 | 1.0 | 2.5 | 17.8 | 5.5  | 21.2 | 4.1 | 102.3 | 3.4 | 9.0  | BDL | BDL |
|                         |         |   | II | 11.5 | 11.5 | 8.0 | 41.9 | 2.0 | 3.4 | 27.6 | 11.0 | 24.3 | 3.0 | 47.1  | 3.6 | 7.5  | 1.3 | BDL |
|                         |         |   | I  | 6.3  | 8.4  | 1.5 | 33.1 | 0.9 | 5.9 | 9.7  | 4.5  | 18.7 | 2.6 | 41.9  | BDL | 2.0  | BDL | BDL |
|                         | Winter  |   | II | 3.0  | 11.9 | 0.5 | 12.0 | 0.2 | 2.5 | 3.1  | 2.1  | 8.4  | 0.0 | 14.4  | BDL | 1.1  | BDL | BDL |
|                         |         | 2 | I  | 4.5  | 4.0  | 1.1 | 12.8 | 0.6 | 1.7 | 7.4  | 1.7  | 15.9 | 0.0 | 18.2  | BDL | 2.3  | BDL | BDL |
|                         | Pre-    |   | I  | 4.5  | 4.5  | 0.9 | 10.3 | 0.5 | 1.7 | 6.4  | 2.2  | 15.8 | 0.0 | 23.8  | BDL | BDL  | BDL | BDL |
|                         | monsoon | 3 | II | 29.2 | 40.8 | 3.6 | 32.0 | 2.0 | 4.5 | 16.6 | 7.3  | 20.0 | 3.5 | 11.3  | 2.0 | 5.4  | 0.4 | BDL |
| Tourist                 |         | 4 | I  | 23.7 | 24.6 | 2.4 | 32.5 | 1.3 | 4.0 | 12.1 | 5.8  | 45.7 | 0.0 | 23.2  | 4.5 | 14.8 | 0.7 | BDL |
|                         | Monsoon | 5 | I  | 40.1 | 46.3 | 4.0 | 59.2 | 4.1 | 7.5 | 43.7 | 13.5 | 43.3 | 3.8 | 14.5  | BDL | 13.3 | 0.6 | BDL |
|                         |         |   | II | 41.8 | 49.5 | 3.7 | 60.8 | 3.8 | 6.3 | 45.5 | 12.2 | 47.0 | 4.5 | 17.5  | 2.8 | 13.9 | 0.5 | BDL |
|                         |         | 6 | I  | 15.3 | 21.0 | 2.8 | 35.1 | 2.2 | 4.7 | 17.1 | 7.6  | 28.4 | 6.3 | 18.1  | 5.6 | 23.4 | 1.0 | BDL |
|                         |         |   | II | 16.6 | 16.6 | 2.4 | 35.6 | 2.3 | 4.7 | 19.1 | 8.2  | 32.3 | BDL | 18.1  | 4.1 | 4.4  | 1.2 | BDL |
|                         |         |   | I  | 6.7  | 12.6 | 1.7 | 24.3 | 0.4 | 2.4 | 3.6  | 0.7  | 7.7  | BDL | 12.2  | BDL | 4.5  | BDL | BDL |
|                         | Winter  |   | II | 10.2 | 16.3 | 1.6 | 12.9 | 0.8 | 5.5 | 5.8  | 1.8  | 14.9 | 0.7 | 18.6  | BDL | 4.9  | BDL | BDL |
|                         |         | 2 | I  | 5.4  | 16.9 | 1.4 | 13.0 | 0.9 | 6.4 | 3.5  | 1.2  | 13.6 | 1.0 | 19.0  | BDL | 4.7  | 0.5 | BDL |
|                         |         |   | II | 3.5  | 6.4  | 0.8 | 6.5  | 0.3 | 3.4 | 1.6  | BDL  | 5.5  | BDL | 9.0   | BDL | BDL  | 0.2 | BDL |
|                         | Pre-    |   | I  | 17.8 | 22.5 | 5.9 | 31.7 | 1.4 | 6.2 | 6.0  | 3.2  | 14.6 | 0.8 | 16.8  | 2.0 | 7.4  | 0.6 | BDL |
|                         | monsoon | 3 | II | 14.6 | 19.4 | 4.6 | 25.3 | 1.6 | 6.7 | 7.4  | 1.4  | 19.6 | 0.9 | 16.9  | 1.5 | 4.4  | 0.4 | BDL |
| Residential             |         | 4 | I  | 34.4 | 43.3 | 3.2 | 31.1 | 1.9 | 5.5 | 5.1  | 1.5  | 13.0 | 1.1 | 8.6   | 2.5 | 5.2  | 0.1 | BDL |
|                         | Monsoon |   | II | 34.0 | 46.3 | 3.3 | 32.2 | 2.3 | 6.8 | 5.8  | 2.5  | 14.1 | 2.9 | 7.7   | 3.9 | 4.5  | 0.1 | BDL |
|                         |         | 5 | I  | 43.2 | 55.2 | 4.9 | 55.3 | 2.6 | 7.2 | 11.0 | 4.6  | 31.8 | 3.0 | 28.8  | BDL | 16.4 | BDL | BDL |
|                         |         |   | II | 31.3 | 42.1 | 3.6 | 38.9 | 2.1 | 5.3 | 7.3  | 3.2  | 21.3 | 1.4 | 12.2  | BDL | 15.9 | BDL | BDL |
|                         |         | 6 | I  | 19.9 | 38.0 | 3.0 | 21.5 | 1.6 | 5.4 | 8.6  | 3.9  | 1.6  | 3.1 | 14.1  | 6.2 | 7.8  | BDL | BDL |
|                         |         |   | II | 23.1 | 32.7 | 4.1 | 26.1 | 1.7 | 5.1 | 10.1 | 3.1  | 18.2 | 1.4 | 12.7  | 3.0 | 15.4 | 0.5 | BDL |
|                         |         |   | I  | 8.2  | 7.3  | 1.0 | 11.4 | 0.4 | 3.0 | 7.7  | 2.6  | 8.8  | BDL | 16.9  | 1.1 | 1.9  | 0.2 | BDL |
| Industrial<br>+Farmland | Winter  |   | II | 9.0  | 7.9  | 1.2 | 11.6 | 0.4 | 3.3 | 10.0 | 2.5  | 11.9 | BDL | 21.5  | BDL | 2.3  | 0.3 | BDL |
|                         |         | 2 | I  | 4.7  | 5.7  | 1.0 | 10.4 | 1.2 | 4.3 | 6.1  | 1.5  | 9.0  | 0.4 | 9.2   | BDL | 2.3  | 0.2 | BDL |
|                         |         |   | II | 4.1  | 5.4  | 0.9 | 9.6  | 0.9 | 4.0 | 6.0  | 2.2  | 8.4  | BDL | 20.2  | BDL | 2.8  | 0.2 | BDL |

|                 |   |    |      |      |     |      |     |      |      |      |      |     |      |     |      |     |     |
|-----------------|---|----|------|------|-----|------|-----|------|------|------|------|-----|------|-----|------|-----|-----|
| Pre-<br>monsoon | 3 | I  | 22.7 | 24.1 | 2.8 | 22.7 | 1.0 | 5.4  | 11.3 | 3.7  | 13.8 | 2.2 | 11.2 | BDL | 4.0  | BDL | BDL |
|                 |   | II | 24.1 | 24.1 | 3.2 | 24.8 | 1.1 | 6.0  | 7.7  | 3.8  | 13.4 | BDL | 11.0 | 2.0 | 5.7  | 0.4 | BDL |
| Monsoon         | 4 | I  | 30.1 | 40.9 | 1.9 | 25.5 | 1.3 | 3.8  | 14.6 | 7.2  | 14.0 | 4.2 | 13.4 | 6.3 | 17.2 | BDL | BDL |
|                 |   | II | 42.5 | 57.8 | 2.9 | 30.7 | 1.8 | 5.2  | 14.3 | 6.3  | 11.3 | 3.1 | 17.0 | 1.5 | 13.2 | BDL | BDL |
|                 | 5 | I  | 42.8 | 55.0 | 4.4 | 45.7 | 3.2 | 9.8  | 34.0 | 12.3 | 24.4 | 3.8 | 39.3 | BDL | 22.9 | BDL | BDL |
|                 |   | II | 48.5 | 66.7 | 4.9 | 51.1 | 3.2 | 10.2 | 37.3 | 13.9 | 26.6 | 3.9 | 24.1 | 5.8 | 6.8  | BDL | BDL |
|                 | 6 | I  | 14.9 | 14.9 | 2.0 | 20.1 | 1.1 | 4.1  | 11.2 | 5.8  | 10.6 | 3.8 | 15.6 | 2.8 | 15.5 | 0.5 | BDL |
|                 |   | II | 20.7 | 19.3 | 2.4 | 26.4 | 1.8 | 5.8  | 21.3 | 9.0  | 13.1 | 5.0 | 24.0 | BDL | 11.4 | 0.8 | BDL |

131

132 **Table SI-5b. Site specific concentrations (pg/m<sup>3</sup>) of OCPs in different urban sites of Pokhara**

133

| Site type | Seasons | Samplin<br>g | <i>o,p'</i> -<br><i>DD</i><br><i>T</i> | <i>p,p'</i> -<br><i>DDT</i> | <i>o,p'</i> -<br><i>DD</i><br><i>E</i> | <i>p,p'</i> -<br><i>DDE</i> | <i>o,p'</i> -<br><i>DD</i><br><i>D</i> | <i>p,p'</i> -<br><i>DD</i><br><i>D</i> | <i>α</i> -<br><i>HC</i><br><i>H</i> | <i>β</i> -<br><i>HC</i><br><i>H</i> | <i>γ</i> -<br><i>HC</i><br><i>H</i> | <i>δ</i> -<br><i>HC</i><br><i>H</i> | <i>HC</i><br><i>B</i> | <i>α</i> -<br><i>end</i><br><i>o</i> | <i>β</i> -<br><i>end</i><br><i>o</i> | <i>Hep</i><br><i>t</i> | <i>Hepx</i> |     |     |
|-----------|---------|--------------|----------------------------------------|-----------------------------|----------------------------------------|-----------------------------|----------------------------------------|----------------------------------------|-------------------------------------|-------------------------------------|-------------------------------------|-------------------------------------|-----------------------|--------------------------------------|--------------------------------------|------------------------|-------------|-----|-----|
| Cropland  | Winter  | 1            | I                                      | 8.9                         | 24.3                                   | 2.6                         | 36.0                                   | BDL                                    | 1.5                                 | 3.5                                 | BDL                                 | 5.9                                 | BDL                   | 8.5                                  | BD                                   | 4.4                    | L           | BDL |     |
|           |         |              | II                                     | 6.1                         | 16.2                                   | 1.5                         | 23.3                                   | BDL                                    | 1.0                                 | 2.1                                 | 0.4                                 | 5.1                                 | 0.2                   | 7.5                                  | 1.1                                  | 1.3                    | 0.2         | BDL |     |
|           | 2       | I            | I                                      | 3.2                         | 9.1                                    | 0.9                         | 13.8                                   | BDL                                    | 0.9                                 | 2.5                                 | 2.3                                 | 11.7                                | 0.5                   | 11.3                                 | BD                                   | 1.4                    | 1.6         | 0.5 | BDL |
|           |         |              | II                                     | 108.                        | 3                                      | 4.7                         | 8                                      | 0.7                                    | 5.3                                 | 2.3                                 | 0.8                                 | 10.9                                | 1.4                   | 11.9                                 | L                                    | 4.6                    | L           | BDL |     |
|           | 3       | I            | I                                      | 17.4                        | 3                                      | 4.7                         | 8                                      | 0.7                                    | 5.3                                 | 2.3                                 | 0.8                                 | 10.9                                | 1.4                   | 11.9                                 | L                                    | 4.6                    | L           | BDL |     |
|           |         |              | II                                     | 12.7                        | 91.0                                   | 3.9                         | 0                                      | 0.6                                    | 4.8                                 | 2.5                                 | 0.6                                 | 13.0                                | BDL                   | 12.4                                 | 0.6                                  | 1.9                    | 0.4         | BDL |     |
|           | 4       | I            | I                                      | 46.7                        | 3                                      | 4.2                         | 7                                      | 0.8                                    | 4.3                                 | 3.6                                 | 0.7                                 | 16.0                                | 0.7                   | 10.0                                 | 5.9                                  | 4.3                    | 0.7         | BDL |     |
|           |         |              | II                                     | 53.8                        | 0                                      | 2.9                         | 6                                      | 0.7                                    | 3.4                                 | 3.4                                 | 0.4                                 | 11.5                                | 1.5                   | 5.5                                  | 2.2                                  | 1.2                    | 0.2         | BDL |     |
|           | 5       | I            | I                                      | 57.7                        | 9                                      | 4.9                         | 2                                      | 1.1                                    | 4.3                                 | 4.6                                 | 3.4                                 | 10.9                                | 7.8                   | 24.7                                 | 4.8                                  | 9.9                    | L           | BDL |     |
|           |         |              | II                                     | 40.4                        | 95.7                                   | 4.0                         | 7                                      | BDL                                    | 3.4                                 | 5.8                                 | 3.1                                 | 11.1                                | 3.0                   | 19.4                                 | 1.0                                  | 2.9                    | 0.3         | BDL |     |
|           | 6       | I            | I                                      | 17.0                        | 33.2                                   | 1.7                         | 35.7                                   | BDL                                    | 1.5                                 | 3.5                                 | 1.1                                 | 4.0                                 | 0.9                   | 6.6                                  | BD                                   | 0.6                    | 1.1         | 0.2 | BDL |
|           |         |              | II                                     | 13.6                        | 24.8                                   | 1.2                         | 18.6                                   | BDL                                    | 0.7                                 | 3.3                                 | 0.5                                 | 3.4                                 | BDL                   | 6.8                                  | L                                    | 1.1                    | 0.2         | BDL |     |
| Winter    | 1       | I            | 13.0                                   | 28.7                        | 1.9                                    | 42.8                        | 0.5                                    | 4.2                                    | 3.6                                 | 1.3                                 | 24.2                                | 1.2                                 | 7.1                   | BD                                   | 3.5                                  | BD                     | BDL         |     |     |

|                                        |                 |        |      |       |       |       |      |      |     |     |      |      |     |      |      |      |     |     |     |
|----------------------------------------|-----------------|--------|------|-------|-------|-------|------|------|-----|-----|------|------|-----|------|------|------|-----|-----|-----|
| Vegetable<br>production<br>area/Market | Pre-<br>monsoon | 2      | II   | 12.2  | 24.5  | 1.5   | 32.1 | 0.7  | 4.8 | 2.9 | BDL  | 19.4 | BDL | 10.8 | L    | 5.8  | L   | BDL |     |
|                                        |                 |        | I    | 9.9   | 31.7  | 1.9   | 32.6 | 0.4  | 4.6 | 2.9 | BDL  | 15.9 | BDL | 7.0  | L    | 10.3 | L   | BDL |     |
|                                        |                 | 3      | II   | 13.0  | 35.3  | 2.3   | 38.6 | 0.6  | 6.1 | 4.0 | BDL  | 20.7 | BDL | 9.6  | L    | 4.4  | 0.2 | BDL |     |
|                                        |                 |        | I    | 25.9  | 45.3  | 2.8   | 48.4 | 0.8  | 4.4 | 2.5 | 1.2  | 17.9 | BDL | 10.1 | L    | 6.2  | L   | BDL |     |
|                                        |                 |        | II   | 12.9  | 20.9  | 2.1   | 29.3 | 0.6  | 2.9 | 3.2 | 0.5  | 10.5 | 1.0 | 11.4 | 1.8  | 3.9  | L   | BDL |     |
|                                        |                 |        | I    | 63.5  | 121.2 | 4.7   | 71.9 | 1.2  | 5.4 | 3.7 | 1.8  | 19.7 | 2.2 | 17.1 | L    | 7.5  | L   | BDL |     |
|                                        | 5               | I      | 20.0 | 582.7 | 10.0  | 6     | 1.9  | 0.0  | 3.1 | 2.0 | 18.9 | 2.3  | 9.5 | L    | 4.0  | L    | BDL |     |     |
|                                        |                 | II     | 18.7 | 497.4 | 7.9   | 271.9 | 1.6  | 18.7 | 2.9 | 1.2 | 12.7 | 3.1  | 7.4 | L    | 2.8  | L    | BDL |     |     |
|                                        | 6               | I      | 39.9 | 74.1  | 3.4   | 64.5  | 1.0  | 3.3  | 5.5 | 1.5 | 15.7 | BDL  | 6.1 | 2.4  | 2.0  | L    | BDL |     |     |
|                                        |                 | II     | 24.8 | 45.2  | 2.0   | 39.9  | 0.7  | 2.7  | 2.8 | 1.2 | 8.5  | 0.6  | 2.5 | 2.8  | 5.3  | 0.1  | BDL |     |     |
|                                        | Industrial      | Winter | 1    | I     | 14.6  | 22.9  | 2.8  | 32.6 | 0.8 | 2.6 | 3.8  | 1.4  | 8.0 | 1.1  | 15.1 | 0.4  | 3.7 | L   | BDL |
|                                        |                 |        |      | II    | 14.4  | 17.0  | 1.8  | 22.9 | 0.5 | 2.5 | 4.5  | BDL  | 8.4 | BDL  | 12.2 | 2.9  | 2.2 | L   | BDL |
| 2                                      |                 |        | I    | 12.3  | 24.8  | 3.6   | 43.4 | 1.1  | 5.3 | 4.2 | 1.8  | 14.5 | 1.4 | 30.4 | 6.2  | 3.7  | L   | BDL |     |
|                                        |                 |        | II   | 18.1  | 20.0  | 2.8   | 25.5 | 2.3  | 9.3 | 9.0 | 5.1  | 32.4 | 1.7 | 25.1 | L    | 6.2  | 0.4 | BDL |     |
| Pre-<br>monsoon                        |                 | 3      | I    | 8.6   | 44.7  | 1.9   | 20.0 | BDL  | 1.6 | 4.4 | 1.0  | 15.9 | 1.3 | 11.3 | 7.2  | 3.7  | L   | BDL |     |
|                                        |                 |        | II   | 13.8  | 5.9   | 3.1   | 30.2 | 0.1  | 2.6 | 5.8 | 1.3  | 19.9 | 1.8 | 14.9 | 11.5 | 5.9  | L   | BDL |     |
|                                        |                 | 4      | I    | 47.5  | 72.4  | 2.9   | 37.7 | 1.2  | 3.6 | 3.5 | 0.6  | 7.4  | 1.5 | 8.7  | L    | 3.9  | L   | BDL |     |
|                                        |                 |        | II   | 41.2  | 61.6  | 2.6   | 31.6 | 0.9  | 2.5 | 2.7 | 0.3  | 5.4  | 1.8 | 7.5  | 1.5  | 10.4 | L   | BDL |     |
| 5                                      | I               | 24.3   | 34.3 | 2.2   | 26.2  | 0.8   | 2.4  | 1.4  | 0.6 | 3.3 | 0.4  | 5.1  | L   | 3.6  | L    | BDL  |     |     |     |
|                                        | II              | 30.6   | 40.6 | 1.8   | 27.1  | 0.8   | 2.5  | 1.5  | 0.3 | 2.7 | 0.3  | 4.1  | BD  | 4.2  | BD   | BDL  |     |     |     |

|  |         |    |      |      |      |      |      |     |     |     |      |      |     |      |     |      |     |     |
|--|---------|----|------|------|------|------|------|-----|-----|-----|------|------|-----|------|-----|------|-----|-----|
|  |         |    |      |      |      |      |      |     |     |     |      |      |     |      | L   |      | L   |     |
|  |         | 6  | I    | 19.8 | 25.3 | 1.7  | 22.7 | 1.1 | 3.0 | 4.8 | 1.0  | 7.5  | 2.4 | 7.7  | 2.2 | 3.0  | L   | BDL |
|  |         |    | II   | 22.1 | 33.0 | 2.7  | 32.6 | 0.7 | 1.9 | 4.4 | 2.2  | 7.1  | 2.4 | 9.0  | 5.6 | 3.8  | L   | BDL |
|  |         |    |      |      |      |      |      |     |     |     |      |      |     |      |     |      | BD  |     |
|  | Tourist | 1  | I    | 4.3  | 5.9  | 0.6  | 8.3  | 0.3 | 1.6 | 1.6 | BDL  | 4.2  | 1.4 | 5.2  | 2.0 | 5.9  | L   | BDL |
|  |         |    | II   | 7.3  | 22.1 | 1.3  | 20.3 | 0.3 | 1.8 | 2.3 | 0.4  | 13.8 | BDL | 9.6  | L   | 10.3 | L   | BDL |
|  |         | 2  | I    | 6.8  | 21.6 | 1.4  | 27.8 | BDL | 2.1 | 2.0 | BDL  | 14.9 | BDL | 7.3  | L   | 5.6  | L   | BDL |
|  |         |    | II   | 7.3  | 22.1 | 1.3  | 20.3 | 0.3 | 1.8 | 2.3 | 0.4  | 13.8 | BDL | 9.6  | L   | 10.3 | L   | BDL |
|  |         | 3  | I    | 18.3 | 25.9 | 2.6  | 26.8 | 0.7 | 2.0 | 1.9 | 0.8  | 8.5  | 1.1 | 14.6 | L   | 6.9  | L   | BDL |
|  |         |    | II   | 14.8 | 17.0 | 1.6  | 17.7 | 1.1 | 2.8 | 2.3 | 1.8  | 7.8  | 0.7 | 6.9  | L   | 2.3  | L   | BDL |
|  | 4       | I  | 45.3 | 67.0 | 3.8  | 37.0 | 1.6  | 3.9 | 2.3 | 0.9 | 8.9  | 1.3  | 9.0 | L    | 5.4 | L    | BDL |     |
|  |         | II | 27.3 | 37.5 | 3.6  | 24.0 | 1.5  | 2.9 | 1.4 | 0.5 | 4.7  | 1.3  | 3.1 | 1.8  | 2.8 | L    | BDL |     |
|  | 5       | I  | 7.0  | 21.5 | 1.1  | 16.6 | 0.5  | 1.1 | 1.7 | 1.5 | 19.4 | 2.8  | 7.6 | 1.9  | 3.6 | L    | BDL |     |
|  |         | II | 4.8  | 17.0 | 0.9  | 12.5 | 0.3  | 0.8 | 1.5 | 1.6 | 19.7 | 3.4  | 5.5 | 1.6  | 1.7 | L    | BDL |     |
|  | 6       | I  | 15.2 | 22.5 | 1.8  | 24.6 | 0.7  | 1.9 | 3.4 | 1.2 | 6.1  | 0.7  | 7.1 | L    | 2.4 | L    | BDL |     |
|  |         | II | 18.2 | 29.7 | 4.3  | 48.2 | 1.5  | 3.4 | 6.4 | 2.3 | 12.9 | 4.3  | 5.7 | 2.5  | 6.6 | 0.3  | BDL |     |

134

135



136 Table SI-5c. Site specific concentrations (pg/m<sup>3</sup>) of OCPs in different urban sites of Hetauda

| Site type                       | Seasons         | Sampling | <i>o,p'</i> -<br>DDT | <i>p,p'</i> -<br>DDT | <i>o,p'</i> -<br>DDE | <i>p,p'</i> -<br>DDE | <i>o,p'</i> -<br>DDD | <i>p,p'</i> -<br>DDD | $\alpha$ -<br>HCH | $\beta$ -<br>HCH | $\gamma$ -HCH | $\delta$ -<br>HCH | HCB | $\alpha$ -<br>endo | $\beta$ -<br>endo | Hept | Hepx |     |
|---------------------------------|-----------------|----------|----------------------|----------------------|----------------------|----------------------|----------------------|----------------------|-------------------|------------------|---------------|-------------------|-----|--------------------|-------------------|------|------|-----|
| Cropland                        | Winter          | 1        | I                    | 1.2                  | 8.5                  | 0.3                  | 3.2                  | BDL                  | 0.5               | 4.7              | 1.1           | 8.5               | 0.8 | 15.7               | 1.3               | 7.3  | BDL  | BDL |
|                                 |                 |          | II                   | 0.9                  | 4.8                  | 0.3                  | 2.1                  | BDL                  | 0.1               | 3.7              | 0.8           | 4.2               | 0.7 | 14.3               | 1.0               | 4.4  | BDL  | BDL |
|                                 |                 | 2        | I                    | 1.6                  | 7.7                  | 0.3                  | 3.2                  | 0.1                  | 0.2               | 4.9              | 1.4           | 10.2              | 2.8 | 11.6               | 1.3               | 9.6  | BDL  | BDL |
|                                 |                 |          | II                   | 2.2                  | 9.5                  | 0.3                  | 3.0                  | 0.1                  | 0.2               | 6.4              | 1.3           | 10.7              | 4.0 | 10.7               | 1.1               | 6.5  | BDL  | BDL |
|                                 | Pre-<br>monsoon | 3        | I                    | 2.4                  | 11.4                 | 0.3                  | 2.2                  | 0.1                  | 0.2               | 3.1              | 0.8           | 5.7               | 1.7 | 6.0                | 0.8               | 5.6  | BDL  | BDL |
|                                 |                 |          | II                   | 4.3                  | 21.2                 | 0.4                  | 3.1                  | 0.1                  | 0.3               | 2.8              | 1.1           | 5.7               | 1.0 | 6.4                | 1.0               | 9.0  | BDL  | BDL |
|                                 | Monsoon         | 4        | I                    | 2.7                  | 11.1                 | 0.6                  | 9.4                  | 0.1                  | 0.2               | 1.4              | 2.0           | 2.4               | 1.5 | 2.8                | 2.7               | 24.4 | BDL  | BDL |
|                                 |                 |          | II                   | 3.6                  | 11.0                 | 0.3                  | 2.7                  | 0.1                  | 0.2               | 1.2              | 0.7           | 2.2               | 0.6 | 3.1                | 0.5               | 3.0  | BDL  | BDL |
|                                 |                 | 5        | I                    | 4.2                  | 12.0                 | 0.3                  | 3.3                  | 0.1                  | 0.2               | 1.9              | 1.0           | 3.7               | 0.5 | 5.4                | 1.1               | 8.0  | BDL  | BDL |
|                                 |                 |          | II                   | 4.2                  | 11.4                 | 0.4                  | 3.7                  | 0.1                  | 0.2               | 1.6              | 1.3           | 3.6               | 0.9 | 5.5                | 0.8               | 6.8  | BDL  | BDL |
| Vegetable<br>production<br>area | Winter          | 1        | I                    | 2.9                  | 26.1                 | 0.5                  | 7.0                  | 0.2                  | 0.4               | 6.9              | BDL           | 2215.7            | 4.3 | 9.4                | 1.5               | 13.2 | 1.0  | BDL |
|                                 |                 |          | II                   | 1.2                  | 5.5                  | 0.3                  | 4.2                  | BDL                  | 0.2               | 3.7              | BDL           | 31.1              | 2.2 | 17.3               | 0.9               | 4.7  | 0.8  | BDL |
|                                 |                 | 2        | I                    | 1.0                  | 7.5                  | 0.6                  | 9.8                  | 0.3                  | 0.2               | 5.1              | 1.8           | 2588.1            | BDL | 15.1               | 1.7               | 5.3  | BDL  | BDL |
|                                 |                 |          | II                   | 1.2                  | 7.4                  | 0.4                  | 6.4                  | 0.1                  | 0.3               | 4.8              | BDL           | 2646.2            | 1.5 | 13.3               | 0.8               | 3.7  | BDL  | BDL |
|                                 | Pre-<br>monsoon | 3        | I                    | 2.9                  | 27.8                 | 0.6                  | 10.3                 | 0.2                  | 0.6               | 6.7              | BDL           | 2420.1            | BDL | 13.3               | 3.2               | 14.8 | BDL  | BDL |
|                                 |                 |          | II                   | 2.1                  | 11.5                 | 0.3                  | 7.5                  | 0.3                  | 0.9               | 4.3              | BDL           | 1205.1            | BDL | 9.2                | 2.3               | 10.6 | BDL  | BDL |
|                                 | Monsoon         | 4        | I                    | 1.7                  | 2.2                  | 0.1                  | 6.1                  | 0.4                  | 1.1               | 3.1              | BDL           | 519.9             | BDL | 7.0                | 1.8               | 8.4  | BDL  | BDL |
|                                 |                 |          | II                   | 0.9                  | 6.7                  | 0.2                  | 3.6                  | BDL                  | 0.3               | 0.6              | BDL           | 137.9             | 0.5 | 3.3                | 0.8               | 2.7  | BDL  | BDL |
|                                 |                 | 5        | I                    | 2.6                  | 15.3                 | 0.5                  | 6.6                  | 0.1                  | 0.4               | 2.2              | BDL           | 334.1             | 3.9 | 5.4                | 2.0               | 11.1 | 0.8  | BDL |
|                                 |                 |          | II                   | 1.6                  | 12.4                 | 0.4                  | 6.2                  | 0.1                  | 0.3               | 1.9              | 1.2           | 248.7             | 1.2 | 5.5                | 1.1               | 6.6  | BDL  | BDL |
| Industrial                      | Winter          | 1        | I                    | 2.9                  | 26.8                 | 1.0                  | 20.8                 | 0.3                  | 0.1               | 7.7              | 6.3           | 16.5              | 7.7 | 29.7               | 5.0               | 33.5 | BDL  | BDL |
|                                 |                 |          | II                   | 3.9                  | 20.5                 | 1.0                  | 15.0                 | 0.2                  | 0.5               | 3.5              | 2.2           | 11.0              | 3.3 | 17.6               | 4.2               | 26.9 | BDL  | BDL |
|                                 |                 | 2        | I                    | 1.3                  | 6.0                  | 0.3                  | 4.5                  | BDL                  | 0.1               | 1.1              | BDL           | 2.4               | 0.6 | 7.7                | 0.8               | 5.3  | BDL  | BDL |
|                                 |                 |          | II                   | 1.0                  | 5.2                  | 0.2                  | 3.8                  | BDL                  | 0.1               | 0.9              | 0.6           | 2.0               | 0.5 | 6.0                | 0.7               | 3.5  | BDL  | BDL |
|                                 | Pre-<br>monsoon | 3        | I                    | 4.4                  | 24.8                 | 0.9                  | 13.9                 | 0.2                  | 0.4               | 4.3              | 4.0           | 8.1               | 2.5 | 14.4               | 3.0               | 23.5 | BDL  | BDL |
|                                 |                 |          | II                   | 4.5                  | 16.2                 | 0.7                  | 9.8                  | 0.1                  | 0.3               | 2.1              | 1.8           | 4.1               | 1.6 | 7.7                | 1.6               | 10.2 | BDL  | BDL |
|                                 | Monsoon         | 4        | I                    | 3.1                  | 11.8                 | 0.6                  | 9.7                  | 0.1                  | 0.2               | 1.4              | 1.3           | 3.0               | 2.1 | 3.1                | 2.3               | 24.3 | BDL  | BDL |
|                                 |                 |          | II                   | 3.1                  | 17.1                 | 0.7                  | 9.1                  | 0.2                  | 0.1               | 3.6              | 1.6           | 3.0               | 2.0 | 14.3               | 2.2               | 9.7  | BDL  | BDL |
|                                 |                 | 5        | I                    | 6.6                  | 46.3                 | 0.8                  | 11.0                 | 0.3                  | 0.1               | 4.5              | 1.2           | 3.1               | 1.4 | 3.4                | 2.1               | 12.5 | BDL  | BDL |
|                                 |                 |          | II                   | 4.0                  | 27.6                 | 0.5                  | 6.6                  | 0.2                  | BDL               | 2.7              | 0.7           | 3.8               | 0.8 | 2.0                | 1.2               | 7.5  | BDL  | BDL |

**Table SI-6a. Site specific concentrations (pg/m<sup>3</sup>) of PCBs in different urban sites of Kathmandu**

| Land type                        | Seasons     | Sampling | PCB-28 | PCB-52 | PCB-101 | PCB-153 | PCB-138 | PCB-180 |     |
|----------------------------------|-------------|----------|--------|--------|---------|---------|---------|---------|-----|
| Crop Land                        | Winter      | 1        | I      | 2.4    | 1.2     | 0.6     | 0.1     | 0.2     | 0.1 |
|                                  |             |          | II     | 2.1    | 0.9     | 0.5     | 0.2     | 0.6     | BDL |
|                                  |             | 2        | I      | 1.4    | 0.5     | 0.4     | 0.1     | 0.1     | 0.2 |
|                                  |             |          | II     | 0.9    | 0.3     | 0.2     | 0.0     | 0.1     | BDL |
|                                  | Pre-monsoon | 3        | I      | 1.8    | 0.8     | 0.6     | 0.2     | 0.2     | 0.1 |
|                                  |             |          | II     | 1.8    | 0.3     | 0.3     | BDL     | BDL     | BDL |
|                                  |             | 4        | I      | 2.3    | 1.0     | 0.8     | 1.6     | 0.3     | 0.1 |
|                                  |             |          | II     | 1.1    | 0.6     | 0.5     | 0.6     | 0.2     | BDL |
|                                  | Monsoon     | 5        | I      | 1.4    | 0.8     | 0.3     | 1.4     | 0.1     | BDL |
|                                  |             |          | II     | 1.5    | 0.9     | 0.5     | 1.2     | 0.2     | BDL |
|                                  |             | 6        | I      | 1.8    | 0.8     | 0.6     | 0.2     | 0.3     | BDL |
|                                  |             |          | II     | 2.5    | 0.5     | 0.4     | 0.2     | BDL     | BDL |
| Vegetable production area/Market | Winter      | 1        | I      | 2.6    | 1.5     | 0.9     | 0.4     | 0.7     | BDL |
|                                  |             |          | II     | 3.2    | 1.2     | 0.9     | 0.2     | 0.7     | BDL |
|                                  |             | 2        | I      | 5.0    | 1.8     | 1.0     | 0.5     | 0.5     | 0.1 |
|                                  |             |          | II     | 5.3    | 1.5     | 0.9     | 0.4     | 0.6     | 0.1 |
|                                  | Pre-monsoon | 3        | I      | 3.6    | 2.8     | 1.4     | 0.7     | 0.9     | 0.2 |
|                                  |             |          | II     | 4.3    | 2.9     | 1.4     | 0.6     | 1.0     | 0.3 |
|                                  |             | 4        | I      | 2.9    | 1.5     | 1.1     | 1.7     | 0.7     | 0.2 |
|                                  |             |          | II     | 6.1    | 5.1     | 3.3     | 2.9     | 1.4     | 0.3 |
|                                  | Monsoon     | 5        | I      | 6.1    | 5.1     | 3.3     | 2.9     | 1.4     | 0.3 |
|                                  |             |          | II     | 4.4    | 4.4     | 3.0     | 1.9     | 1.2     | 0.3 |
|                                  |             | 6        | I      | 4.3    | 2.3     | 1.6     | 0.7     | 0.6     | 0.2 |
|                                  |             |          | II     | 5.1    | 3.4     | 2.0     | 1.2     | 0.3     | 0.2 |
| Industrial                       | Winter      | 1        | I      | 1.6    | 0.7     | 0.3     | 1.8     | 3.2     | 0.1 |
|                                  |             |          | II     | 2.6    | 0.7     | 0.4     | 0.1     | 0.2     | BDL |
|                                  |             | 2        | I      | 3.1    | 2.0     | 0.7     | 0.4     | 0.4     | 0.1 |
|                                  |             |          | II     | 3.8    | 1.9     | 0.7     | 0.3     | 0.3     | 0.1 |
|                                  | Pre-monsoon | 3        | I      | 4.2    | 3.8     | 3.7     | 1.6     | 2.0     | 0.3 |
|                                  |             |          | II     | 4.4    | 3.2     | 3.2     | 1.4     | 1.7     | 0.1 |
|                                  |             | 4        | I      | 3.9    | 2.1     | 1.1     | 2.0     | 0.6     | 0.2 |
|                                  |             |          | II     | 3.4    | 1.3     | 0.8     | 1.8     | 0.4     | 0.1 |
|                                  | Monsoon     | 5        | I      | 3.3    | 2.3     | 1.8     | 1.4     | 0.9     | 0.2 |
|                                  |             |          | II     | 7.6    | 3.8     | 3.2     | 2.1     | 1.5     | 0.2 |
|                                  |             | 6        | I      | 15.3   | 3.2     | 1.1     | 0.7     | 0.5     | 0.1 |
|                                  |             |          | II     | 14.2   | 17.5    | 2.2     | 1.8     | 1.5     | 0.3 |
| Tourist                          | Winter      | 1        | I      | 7.9    | 1.5     | 0.8     | 0.7     | 0.4     | 0.1 |
|                                  |             |          | II     | 4.3    | 0.8     | 0.4     | 1.4     | 0.2     | BDL |
|                                  |             | 2        | I      | 3.1    | 0.5     | 0.4     | 0.4     | 0.1     | BDL |

|                         |                 |   |    |      |     |     |     |     |     |
|-------------------------|-----------------|---|----|------|-----|-----|-----|-----|-----|
|                         | Pre-<br>monsoon | 3 | I  | 3.7  | 0.6 | 0.4 | 0.6 | 0.0 | BDL |
|                         |                 |   | II | 3.2  | 1.6 | 0.9 | 0.7 | 0.4 | 0.1 |
|                         |                 | 4 | I  | 4.1  | 1.6 | 1.1 | 1.8 | 0.4 | 0.2 |
|                         | Monsoon         | 5 | I  | 5.1  | 1.5 | 1.1 | 1.7 | 0.5 | BDL |
|                         |                 |   | II | 3.5  | 1.6 | 1.1 | 1.6 | 0.4 | 0.1 |
|                         |                 | 6 | I  | 4.5  | 2.1 | 1.2 | 0.6 | 0.5 | 0.2 |
|                         |                 |   | II | 3.9  | 1.7 | 1.0 | 0.3 | 0.4 | BDL |
|                         |                 |   |    |      |     |     |     |     |     |
|                         | Winter          | 1 | I  | 1.4  | 0.6 | 0.4 | 0.2 | 0.4 | BDL |
|                         |                 |   | II | 5.9  | 2.6 | 1.6 | 0.7 | 0.7 | 0.1 |
|                         |                 | 2 | I  | 4.7  | 2.5 | 1.3 | 0.6 | 0.8 | 0.2 |
|                         |                 |   | II | 3.8  | 1.2 | 0.6 | 0.3 | 0.5 | 0.1 |
| Residential             | Pre-<br>monsoon | 3 | I  | 10.4 | 5.4 | 2.3 | 1.7 | 1.3 | 0.4 |
|                         |                 |   | II | 9.6  | 5.4 | 2.3 | 1.6 | 1.2 | 0.4 |
|                         |                 | 4 | I  | 8.8  | 3.1 | 1.4 | 1.7 | 0.8 | 0.2 |
|                         |                 |   | II | 7.9  | 3.7 | 1.6 | 1.9 | 0.7 | 0.2 |
|                         | Monsoon         | 5 | I  | 10.5 | 6.0 | 2.4 | 2.2 | 1.0 | 0.2 |
|                         |                 |   | II | 7.5  | 4.1 | 1.8 | 2.0 | 1.0 | 0.2 |
|                         |                 | 6 | I  | 8.8  | 5.2 | 4.3 | 2.9 | 2.2 | 0.3 |
|                         |                 |   | II | 9.8  | 5.9 | 5.2 | 3.6 | 3.1 | 0.3 |
|                         |                 |   |    |      |     |     |     |     |     |
|                         | Winter          | 1 | I  | 7.4  | 2.1 | 1.0 | 0.7 | 0.6 | 0.3 |
|                         |                 |   | II | 9.9  | 2.1 | 0.8 | 0.6 | 0.4 | 0.2 |
|                         |                 | 2 | I  | 5.7  | 2.1 | 0.7 | 0.5 | 0.4 | 0.2 |
|                         |                 |   | II | 5.9  | 1.7 | 0.6 | 0.6 | 0.6 | 0.2 |
| Industrial<br>+Farmland | Pre-<br>monsoon | 3 | I  | 7.7  | 3.2 | 1.1 | 1.1 | 0.6 | 0.3 |
|                         |                 |   | II | 8.0  | 3.0 | 1.2 | 1.3 | 0.7 | 0.3 |
|                         |                 | 4 | I  | 16.1 | 4.5 | 1.2 | 1.5 | 0.6 | 0.3 |
|                         |                 |   | II | 6.1  | 2.3 | 1.4 | 1.7 | 1.1 | 0.7 |
|                         | Monsoon         | 5 | I  | 10.6 | 3.0 | 1.3 | 3.2 | 0.8 | 0.4 |
|                         |                 |   | II | 8.8  | 3.3 | 1.4 | 1.5 | 1.0 | 0.4 |
|                         |                 | 6 | I  | 9.3  | 3.5 | 1.5 | 1.0 | 0.8 | 0.2 |
|                         |                 |   | II | 14.7 | 5.0 | 1.8 | 1.5 | 0.8 | 0.3 |

139

140

**Table SI-6b. Site specific concentrations (pg/m<sup>3</sup>) of PCBs in different urban sites of Pokhara**

| Site type                              | Seasons         | Sampling        |    | <i>PCB-28</i> | <i>PCB-52</i> | <i>PCB-101</i> | <i>PCB-153</i> | <i>PCB-138</i> | <i>PCB-180</i> |     |
|----------------------------------------|-----------------|-----------------|----|---------------|---------------|----------------|----------------|----------------|----------------|-----|
| Cropland                               | Winter          | 1               | I  | 1.0           | 0.3           | 0.3            | 0.5            | BDL            | BDL            |     |
|                                        |                 |                 | II | 0.8           | 0.2           | 0.1            | 1.2            | BDL            | BDL            |     |
|                                        |                 | 2               | I  | 1.0           | 0.3           | 0.2            | 0.3            | BDL            | BDL            |     |
|                                        |                 |                 | II | 1.5           | 0.9           | 0.4            | 0.4            | 0.1            | BDL            |     |
|                                        |                 | Pre-<br>monsoon | 3  | I             | 1.1           | 0.4            | 0.2            | 0.4            | BDL            | BDL |
|                                        |                 |                 |    | II            | 0.8           | 0.4            | 0.4            | 0.5            | BDL            | BDL |
|                                        | Monsoon         | 4               | I  | 1.3           | 0.4           | 0.3            | 0.6            | 0.1            | BDL            |     |
|                                        |                 |                 | II | 4.1           | 0.8           | 0.4            | 0.7            | BDL            | BDL            |     |
|                                        |                 | 5               | I  | 1.6           | 0.7           | 0.5            | 0.7            | BDL            | BDL            |     |
|                                        |                 |                 | II | 0.9           | 0.5           | 0.4            | 0.1            | 0.2            | 0.1            |     |
|                                        |                 | 6               | I  | 0.6           | 0.3           | 0.2            | BDL            | BDL            | BDL            |     |
|                                        |                 |                 | II |               |               |                |                |                |                |     |
| Vegetable<br>production<br>area/Market | Winter          | 1               | I  | 1.4           | 0.7           | 0.7            | 0.8            | 0.5            | 0.1            |     |
|                                        |                 |                 | II | 1.1           | 0.4           | 0.3            | 0.6            | 0.4            | BDL            |     |
|                                        |                 | 2               | I  | 0.8           | 0.4           | 0.5            | 0.5            | BDL            | 0.1            |     |
|                                        |                 |                 | II | 1.3           | 0.5           | 0.6            | 0.5            | 0.3            | 0.2            |     |
|                                        |                 | Pre-<br>monsoon | 3  | I             | 1.1           | 0.6            | 0.7            | 0.8            | 0.4            | 0.2 |
|                                        |                 |                 |    | II            | 2.5           | 1.0            | 0.6            | 1.5            | 0.3            | 0.1 |
|                                        | Monsoon         | 4               | I  | 1.3           | 0.7           | 0.8            | 1.0            | 0.7            | 0.2            |     |
|                                        |                 |                 | II | 2.1           | 1.6           | 0.2            | 0.3            | 0.3            | 0.1            |     |
|                                        |                 | 5               | I  | 1.6           | 1.1           | 0.1            | 0.3            | 0.2            | 0.1            |     |
|                                        |                 |                 | II | 1.2           | 0.6           | 0.6            | 0.5            | 0.3            | 0.1            |     |
|                                        |                 | 6               | I  | 0.9           | 0.5           | 0.4            | 0.2            | 0.2            | 0.1            |     |
|                                        |                 |                 | II |               |               |                |                |                |                |     |
| Industrial                             | Winter          | 1               | I  | 2.0           | 0.9           | 0.6            | 0.2            | 0.2            | BDL            |     |
|                                        |                 |                 | II | 1.0           | 0.4           | 0.3            | BDL            | BDL            | BDL            |     |
|                                        |                 | 2               | I  | 4.9           | 1.6           | 0.7            | 0.4            | 0.3            | BDL            |     |
|                                        |                 |                 | II | 15.1          | 5.2           | 2.7            | 1.0            | 0.9            | 0.2            |     |
|                                        |                 | Pre-<br>monsoon | 3  | I             | 4.3           | 1.1            | 0.1            | 0.2            | 0.2            | BDL |
|                                        |                 |                 |    | II            | 5.2           | 1.4            | 0.1            | 0.3            | 0.3            | 0.1 |
|                                        | Monsoon         | 4               | I  | 0.8           | 0.4           | 0.3            | 0.4            | 0.2            | BDL            |     |
|                                        |                 |                 | II | 1.3           | 0.3           | 0.3            | 0.5            | 0.1            | BDL            |     |
|                                        |                 | 5               | I  | 0.4           | 0.2           | 0.1            | 0.8            | 0.1            | BDL            |     |
|                                        |                 |                 | II | 0.5           | 0.2           | 0.2            | 1.0            | 0.1            | BDL            |     |
|                                        |                 | 6               | I  | 0.9           | 0.6           | 0.3            | 0.1            | 0.1            | BDL            |     |
|                                        |                 |                 | II | 1.2           | 0.8           | 0.5            | 0.2            | 0.2            | BDL            |     |
| Tourist                                | Winter          | 1               | I  | 0.6           | 0.2           | 0.1            | 0.8            | 0.3            | BDL            |     |
|                                        |                 |                 | II | 1.5           | 0.3           | 0.2            | 0.1            | 0.2            | BDL            |     |
|                                        |                 | 2               | I  | 1.2           | 0.3           | 0.2            | BDL            | BDL            | BDL            |     |
|                                        | Pre-<br>monsoon | 3               | I  | 1.6           | 0.4           | 0.3            | 5.3            | 0.2            | 0.1            |     |
|                                        |                 |                 | II | 1.0           | 0.5           | 0.3            | 1.5            | 0.2            | BDL            |     |
|                                        |                 |                 |    |               |               |                |                |                |                |     |

|         |   |    |     |     |     |     |     |     |
|---------|---|----|-----|-----|-----|-----|-----|-----|
| Monsoon | 4 | I  | 0.9 | 0.4 | 0.5 | 0.6 | 0.3 | 0.1 |
|         |   | II | 0.5 | 0.3 | 0.3 | 0.5 | 0.2 | BDL |
|         | 5 | I  | 1.9 | 0.8 | 0.1 | 0.1 | 0.7 | 0.1 |
|         |   | II | 1.5 | 0.6 | 0.1 | 0.2 | 0.1 | 0.1 |
|         | 6 | I  | 1.4 | 1.5 | 1.0 | 0.2 | 0.3 | 0.1 |
|         |   | II | 4.6 | 4.6 | 2.4 | 1.1 | 0.8 | 0.2 |

---

143

144

**Table SI-6c. Site specific concentrations (pg/m<sup>3</sup>) of PCBs in different urban sites of Hetauda**

| Site type                       | Seasons         | Sampling | PCB-28 | PCB-52 | PCB-101 | PCB-153 | PCB-138 | PCB-180 |     |
|---------------------------------|-----------------|----------|--------|--------|---------|---------|---------|---------|-----|
| Cropland                        | Winter          | 1        | I      | 2.7    | 1.1     | BDL     | 0.2     | 0.2     | 0.2 |
|                                 |                 |          | II     | 2.7    | 0.5     | 0.0     | 0.1     | 0.2     | BDL |
|                                 |                 | 2        | I      | 1.3    | 0.8     | 0.6     | 0.2     | 0.2     | 0.1 |
|                                 |                 |          | II     | 1.7    | 0.8     | 0.3     | 0.2     | 0.2     | BDL |
|                                 | Pre-<br>monsoon | 3        | I      | 1.3    | 0.5     | 0.4     | 0.2     | 0.2     | BDL |
|                                 |                 |          | II     | 1.8    | 0.8     | 0.8     | 0.3     | 0.4     | 0.1 |
|                                 | Monsoon         | 4        | I      | 0.6    | 0.3     | 0.4     | 0.4     | 0.2     | BDL |
|                                 |                 |          | II     | 0.6    | 0.2     | 0.1     | 0.1     | 0.1     | BDL |
|                                 |                 | 5        | I      | 0.6    | 0.4     | 0.6     | 0.1     | 0.1     | BDL |
|                                 |                 |          | II     | 3.4    | 2.9     | 1.1     | 1.6     | 1.9     | 0.7 |
| Vegetable<br>production<br>area | Winter          | 1        | I      | 4.7    | 2.9     | 0.8     | 0.6     | 0.8     | 0.3 |
|                                 |                 |          | II     | 8.6    | 1.2     | 0.0     | 0.1     | 0.0     | 0.2 |
|                                 |                 | 2        | I      | 9.2    | 2.6     | 0.9     | 0.2     | 0.4     | 0.2 |
|                                 |                 |          | II     | 3.4    | 1.3     | 0.0     | 0.1     | 0.7     | 0.6 |
|                                 | Pre-<br>monsoon | 3        | I      | 4.9    | 3.8     | 0.9     | 0.9     | 2.1     | 0.5 |
|                                 |                 |          | II     | 2.4    | 2.1     | 1.3     | 0.5     | 1.3     | 0.4 |
|                                 | Monsoon         | 4        | I      | 1.0    | 1.2     | 1.6     | 0.2     | 0.8     | 0.2 |
|                                 |                 |          | II     | 0.5    | 0.7     | 0.6     | 0.1     | 1.4     | 0.8 |
|                                 |                 | 5        | I      | 1.9    | 1.3     | 0.7     | 0.3     | 0.4     | 0.3 |
|                                 |                 |          | II     | 1.6    | 1.1     | 0.6     | 0.4     | 0.3     | 0.1 |
| Industrial                      | Winter          | 1        | I      | 3.4    | 1.7     | 1.0     | 1.2     | 1.8     | 0.4 |
|                                 |                 |          | II     | 3.1    | 0.7     | 1.2     | 1.0     | 0.7     | 0.3 |
|                                 |                 | 2        | I      | 1.1    | 0.4     | 0.3     | 0.2     | 0.4     | 0.1 |
|                                 |                 |          | II     | 2.5    | 1.2     | 0.3     | 0.7     | 0.6     | 0.2 |
|                                 | Pre-<br>monsoon | 3        | I      | 4.1    | 1.1     | 1.3     | 0.6     | 0.7     | 0.2 |
|                                 |                 |          | II     | 1.1    | 0.7     | 0.9     | 0.5     | 0.5     | 0.1 |
|                                 | Monsoon         | 4        | I      | 3.9    | 0.8     | 0.3     | 0.1     | 0.4     | 0.1 |
|                                 |                 |          | II     | 5.1    | 1.5     | 0.8     | 0.5     | 0.7     | 0.3 |
|                                 |                 | 5        | I      | 2.2    | 2.0     | 1.0     | 1.0     | 0.9     | 0.3 |
|                                 |                 |          | II     | 1.3    | 1.2     | 0.6     | 0.6     | 0.6     | 0.2 |

148 **Table SI-7. Comparison of current levels (pg/m<sup>3</sup>) of various POPs with different tropical/subtropical urban sites**

149

| Places                        | o,p'-DDT | p, p'-DDT | p, p'-DDE | α-HCH   | γ-HCH    | α-endo   | β-endo | ∑PCBs    | Sampling time   |
|-------------------------------|----------|-----------|-----------|---------|----------|----------|--------|----------|-----------------|
| <b>This study</b>             |          |           |           |         |          |          |        |          |                 |
| Kathmandu*                    | 4 - 77   | 3 - 121   | 4 - 157   | 3 - 45  | 4 - 133  | BDL- 10  | 2 - 19 | 2.1-29.2 | Aug - Aug, 2015 |
| Pokhara*                      | 3 - 64   | 6 - 540   | 8 - 306   | 1 - 7   | 3 - 23   | BDL - 9  | 1 - 8  | 1.6-16.6 | Aug - Aug, 2015 |
| Hetauda*                      | 1 - 5    | 4 - 37    | 3 - 18    | 1 - 6   | 2 - 2617 | 1 - 5    | 4 - 30 | 1.4-10.5 | Aug - Aug, 2015 |
| <b>GAPs study<sup>a</sup></b> |          |           |           |         |          |          |        |          |                 |
| Chengdu, China**              |          | BDL       | BDL-56    | 145-176 | 68-142   | 8-47     | BDL-59 | 187-249  | Jan-Jun2005     |
| Kuwait city, Kuwait**         |          | 131       | 22-58     | 1-13    | 1-17     | 76-168   | BDL-16 | 86-497   | Jan-Sept 2005   |
| Manila, Philippines**         |          | 190       | 14-45     | BDL-1   | BDL-15   | 13-66    | BDL-4  | 629-2826 | Jan-Sept 2005   |
| Izmir, Turkey**               |          | BDL       | 60-46     | 18-30   | 13-18    | 494-1352 | 46-464 | 174-287  | Jan-Jun2005     |
| Seoul, Korea**                |          |           | 34        | 84      | 43       | 4411     | 957    | 397      | Jun-Sept 2005   |
| Malawi, Africa                |          |           | BDL       | BDL     | 9        | 162      | 10     | BDL      | Mar-June 2005   |
| <b>Mexico<sup>b</sup></b>     |          |           |           |         |          |          |        |          |                 |
| Mexico city                   | 17       | ND        | 21        | 8.9     | 49       | 320      | 68     |          | 2005-2006       |
| Chihuahua                     | 1.7      | ND        | 25        | 5.9     | 11       | 351      | 95     |          | 2005-2006       |
| San Luis Potosi               | 1.4      | ND        | 13        | 9.4     | 16       | 260      | 40     |          | 2005-2006       |

150

151 *All the studies used PUF-PAS*

152 <sup>a</sup>*Pozo et al., 2009*

153 <sup>b</sup>*Wong et al., 2009*

154 \*∑6PCBs

155 \*\*∑48PCBs

156 **Table SI-8. Range and average (pg/m<sup>3</sup>) with Highest to lowest concentration ratio (H/L) of**  
 157 **different isomers/congeners**  
 158

| Compounds         | Minimum | Maximum | Mean  | SD    | H/L  |
|-------------------|---------|---------|-------|-------|------|
| <i>o, p'</i> -DDT | 1.1     | 77.1    | 19.2  | 17.7  | 72   |
| <i>p, p'</i> -DDT | 2.9     | 540     | 40.4  | 66.4  | 189  |
| <i>o, p'</i> -DDE | 0.1     | 10.4    | 2.5   | 2     | 70   |
| <i>p, p'</i> -DDE | 2.7     | 305.8   | 35.3  | 46.5  | 114  |
| <i>o, p'</i> -DDD | BDL     | 4       | 0.9   | 0.9   |      |
| <i>p, p'</i> -DDD | BDL     | 11.4    | 3.2   | 2.6   |      |
| <i>Total DDT</i>  | 11      | 885.2   | 101.5 | 122.9 | 80   |
| <i>α</i> -HCH     | 1       | 44.6    | 6.7   | 7     | 46   |
| <i>β</i> -HCH     | BDL     | 13.1    | 2.4   | 2.6   |      |
| <i>γ</i> -HCH     | 2.2     | 2617.1  | 109.8 | 396.4 | 1200 |
| <i>δ</i> -HCH     | BDL     | 7.5     | 1.7   | 1.5   |      |
| <i>Total HCHs</i> | 4       | 2623.8  | 120.6 | 395.7 | 655  |
| <i>HCB</i>        | 2.7     | 186.2   | 17.6  | 23.9  | 68   |
| <i>α</i> -endo    | BDL     | 10.2    | 1.8   | 1.9   |      |
| <i>β</i> -endo    | 1.1     | 30.2    | 7.2   | 5.3   | 28   |
| <i>Total endo</i> | 1.4     | 34.8    | 9     | 6.4   | 25   |
| <i>PCB-28</i>     | 0.4     | 14.8    | 3.7   | 3.1   | 35   |
| <i>PCB-52</i>     | 0.2     | 10.4    | 1.7   | 1.7   | 49   |
| <i>PCB-101</i>    | BDL     | 4.7     | 0.9   | 0.8   |      |
| <i>PCB-153</i>    | BDL     | 3.4     | 0.8   | 0.7   |      |
| <i>PCB-138</i>    | BDL     | 2.6     | 0.5   | 0.5   |      |
| <i>PCB-180</i>    | BDL     | 0.5     | 0.1   | 0.1   |      |
| <i>Total PCBs</i> | 1.4     | 29.2    | 7.8   | 6     | 20   |

159



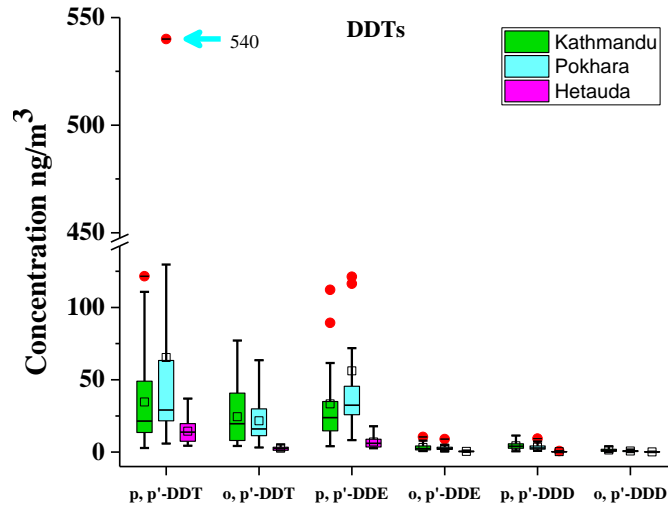

160

161 **Figure SI-3. Box and whisker plot to show distribution of different isomers of DDT and**  
 162 **its metabolites in Kathmandu Pokhara and Hetauda**(Lower and upper limits of whisker  
 163 indicate minimum and maximum, Lower and upper limits of the box indicate 25<sup>th</sup> and 75<sup>th</sup>  
 164 percentiles, horizontal line in the box indicates median, small square in the box represents  
 165 mean, red circle denotes outlier)

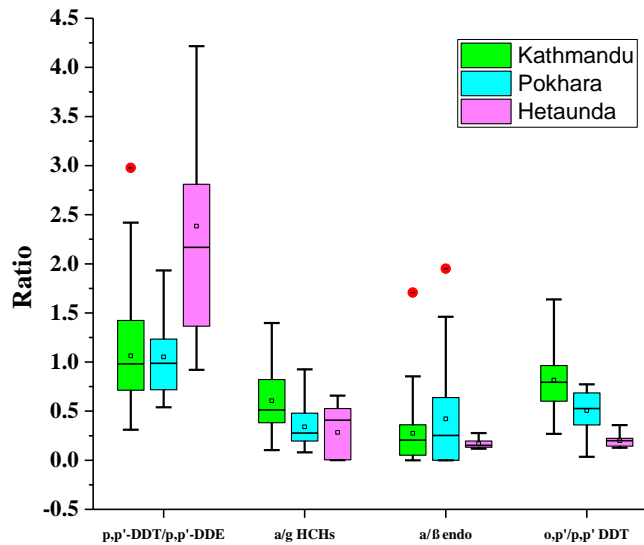

166

167 **Figure SI-4. Isomers/ metabolites ratios of selected OCPs to predict source type**(Lower  
 168 and upper limits of whisker indicate minimum and maximum, Lower and upper limits of the  
 169 box indicate 25<sup>th</sup> and 75<sup>th</sup> percentiles, horizontal line in the box indicates median, small square  
 170 in the box represents mean, red circle denotes outlier)

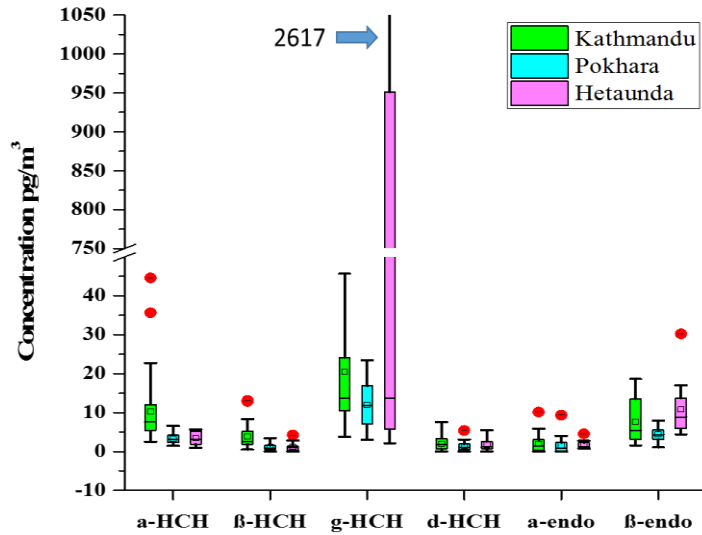

171

172 **Figure SI-5. Box and whisker plot to show distribution of different isomers of HCH and**  
 173 **endosulfan in Kathmandu Pokhara and Hetaunda**(Lower and upper limits of whisker indicate  
 174 minimum and maximum, Lower and upper limits of the box indicate 25<sup>th</sup> and 75<sup>th</sup> percentiles,  
 175 horizontal line inside the box indicates median, small square in the box represents mean, red circle  
 176 denotes outlier)

177

178

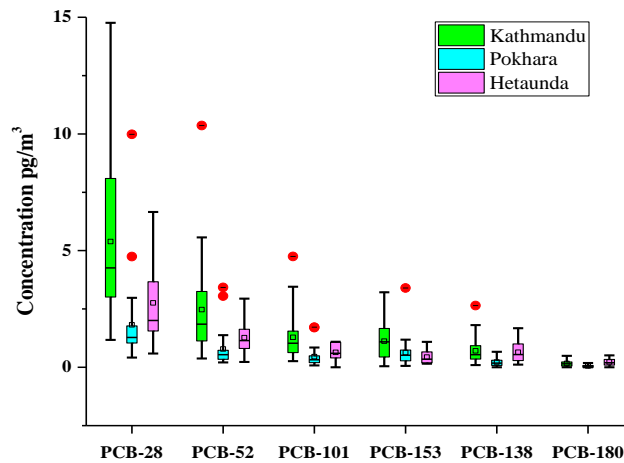

179

180 **Figure SI-6. Box and whisker plot to show distribution of different congeners of PCBs in**  
 181 **Kathmandu Pokhara and Hetaunda**(Lower and upper limits of whisker indicate minimum and  
 182 maximum, Lower and upper limits of the box indicate 25<sup>th</sup> and 75<sup>th</sup> percentiles, horizontal line in the  
 183 box indicates median, small square in the box represents mean, red circle denotes outlier)

184

185 **Table SI-9. P-values (one-way ANOVA) for significant variation in levels of different POPs in different sites**  
 186

|           | <i>o,p'</i> -DDT | <i>p,p'</i> -DDT | <i>o,p'</i> -DDE | <i>p,p'</i> -DDE | <i>α</i> -HCH | <i>γ</i> -HCH | <b>HCB</b>  | <i>α</i> -endo | <i>β</i> -endo | <b>PCBs</b> |
|-----------|------------------|------------------|------------------|------------------|---------------|---------------|-------------|----------------|----------------|-------------|
| Kathmandu | 0.40             | <b>0.01</b>      | 0.11             | <b>0.00</b>      | 0.11          | <b>0.05</b>   | <b>0.00</b> | 0.36           | 0.21           | <b>0.00</b> |
| Pokhara   | 0.65             | 0.27             | 0.34             | 0.18             | 0.13          | 0.12          | 0.39        | 0.16           | 0.15           | 0.54        |
| Hetauda   | 0.14             | 0.17             | <b>0.02</b>      | <b>0.02</b>      | 0.73          | <b>0.02</b>   | 0.80        | 0.16           | 0.13           | <b>0.04</b> |

187

188

189 **Table SI-10. Significant differences (P<0.05, Tukey's Test) in OCPs concentrations among the sites**  
 190 **in Kathmandu (only the chemicals with variations have been shown)**

191

|    |    | p, p'-DDT   | p, p'-DDE   | γ-HCH       | HCB         | PCB         |
|----|----|-------------|-------------|-------------|-------------|-------------|
| K1 | K2 | <b>0.03</b> | <b>0.00</b> | <b>0.05</b> | 1.00        | 0.27        |
|    | K3 | 1.00        | 0.90        | 0.98        | <b>0.00</b> | <b>0.03</b> |
|    | K4 | 1.00        | 0.80        | 0.50        | 0.99        | 0.75        |
|    | K5 | 1.00        | 0.92        | 0.99        | 1.00        | <b>0.00</b> |
|    | K6 | 1.00        | 0.96        | 0.99        | 0.99        | <b>0.01</b> |
| K2 | K3 | <b>0.04</b> | <b>0.01</b> | 0.20        | <b>0.00</b> | 0.91        |
|    | K4 | <b>0.02</b> | <b>0.02</b> | 0.77        | 1.00        | 0.96        |
|    | K5 | <b>0.05</b> | <b>0.01</b> | 0.16        | 1.00        | 0.35        |
|    | K6 | <b>0.04</b> | <b>0.01</b> | 0.14        | 1.00        | 0.48        |
| K3 | K4 | 1.00        | 1.00        | 0.90        | <b>0.00</b> | 0.45        |
|    | K5 | 1.00        | 1.00        | 1.00        | <b>0.00</b> | 0.91        |
|    | K6 | 1.00        | 1.00        | 1.00        | <b>0.00</b> | 0.97        |
| K4 | K5 | 1.00        | 1.00        | 0.85        | 1.00        | 0.08        |
|    | K6 | 1.00        | 1.00        | 0.82        | 1.00        | 0.12        |
| K5 | K6 | 1.00        | 1.00        | 1.00        | 1.00        | 1.00        |

192

193 **Table SI-11. Significant differences (P<0.05, Tukey's post hoc Test) in OCPs concentrations among**  
 194 **the sites in Hetauda (only the chemicals with variations have been shown)**

195

196

|    |    | p, p'-DDE   | β-HCH       | γ-HCH       | PCBs        |
|----|----|-------------|-------------|-------------|-------------|
| H1 | H2 | 0.29        | 0.36        | <b>0.02</b> | <b>0.03</b> |
|    | H3 | <b>0.01</b> | 0.42        | 0.88        | 0.2         |
| H2 | H3 | 0.21        | <b>0.04</b> | <b>0.05</b> | 0.54        |

197

198

199

200

201

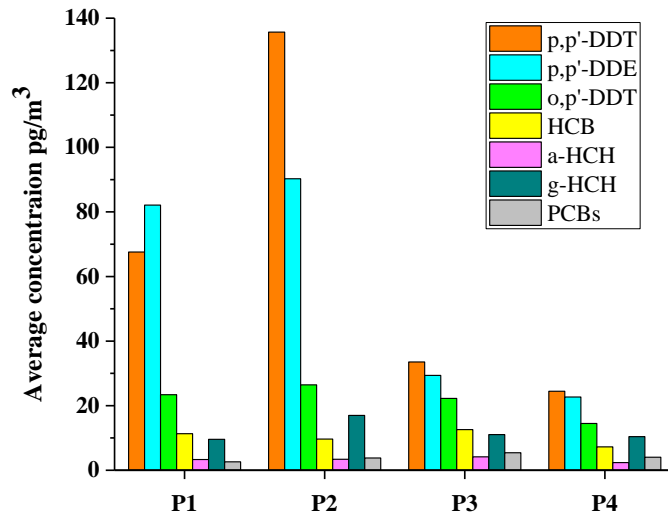

202

203 **Figure SI-7. Atmospheric level of OCPs in different land cover types in Pokhara; (P1-Cropland; P2-**  
204 **Vegetable production and Market area; P3- Industrial area; and P4- Tourist place)**

205

206

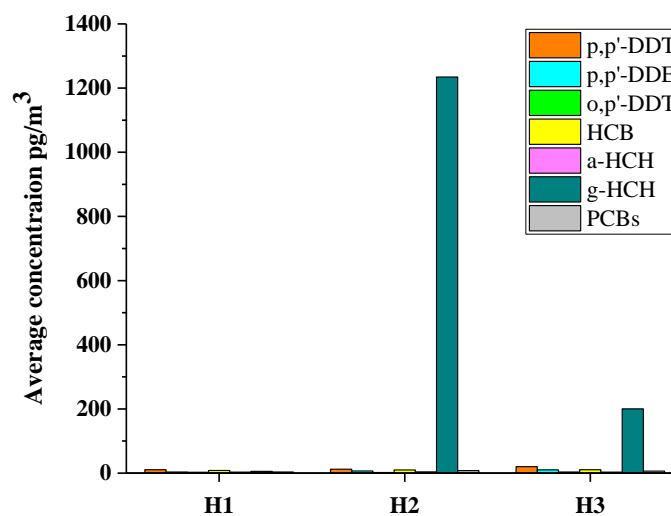

207

208 **Figure SI-8. Atmospheric level of OCPs in different land cover types in Hetauda; (H1-Crop Land;**  
209 **H2-Vegetable production area; H3- Industrial area)**

210

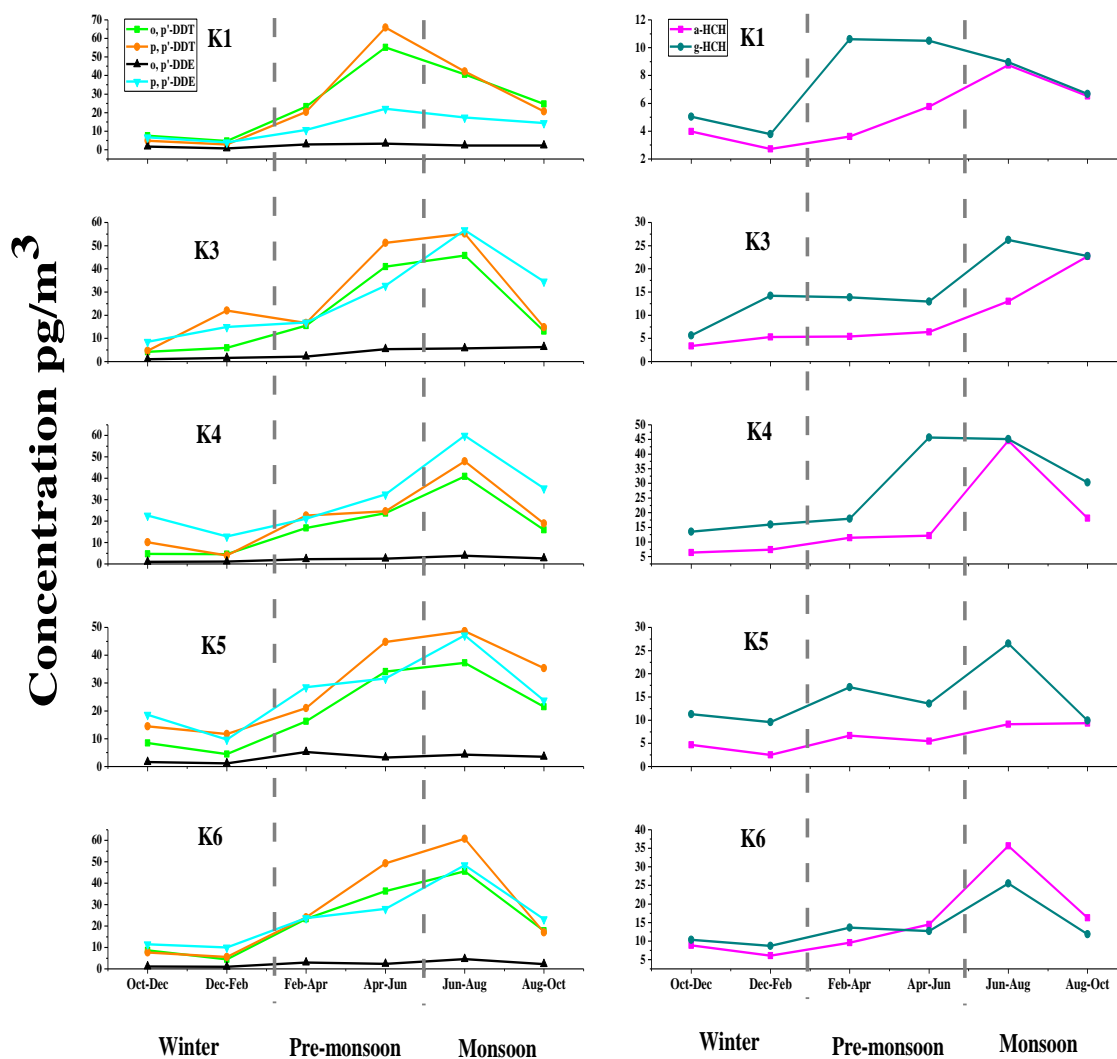

212

213

214 **Figure SI-9. Seasonality of DDTs and HCHs in Kathmandu city (K1: Cropland, K3: Industrial area,**  
 215 **K4: Tourist area, K5: Residential area, K6: mix of farm land and industrial area)**

216

217

218

219

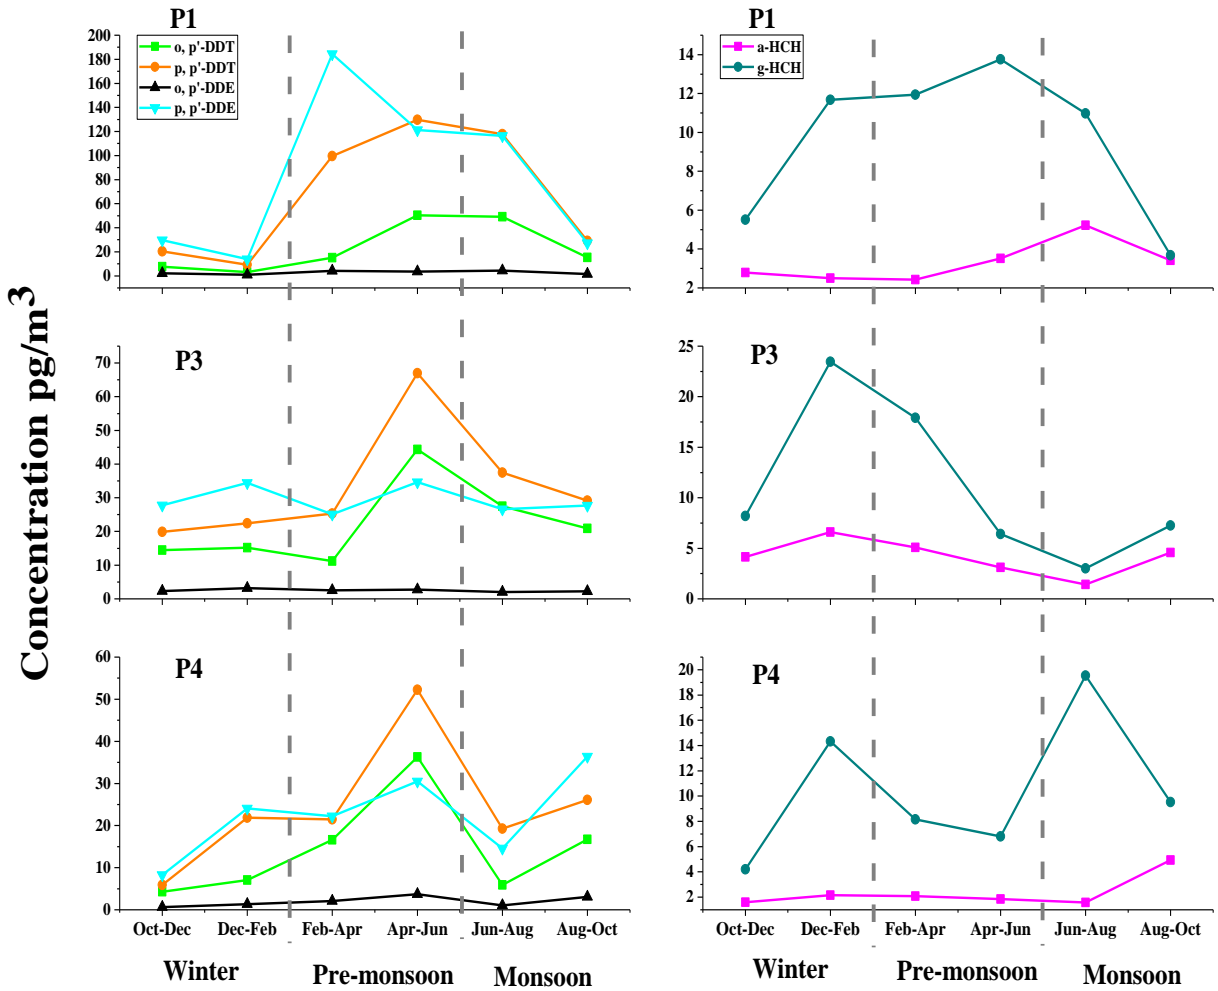

220

221 **Figure SI-10. Seasonality of DDTs and HCHs in Pokhara city (P1: Cropland, P3: Industrial area, P4:**  
 222 **Tourist area)**

223



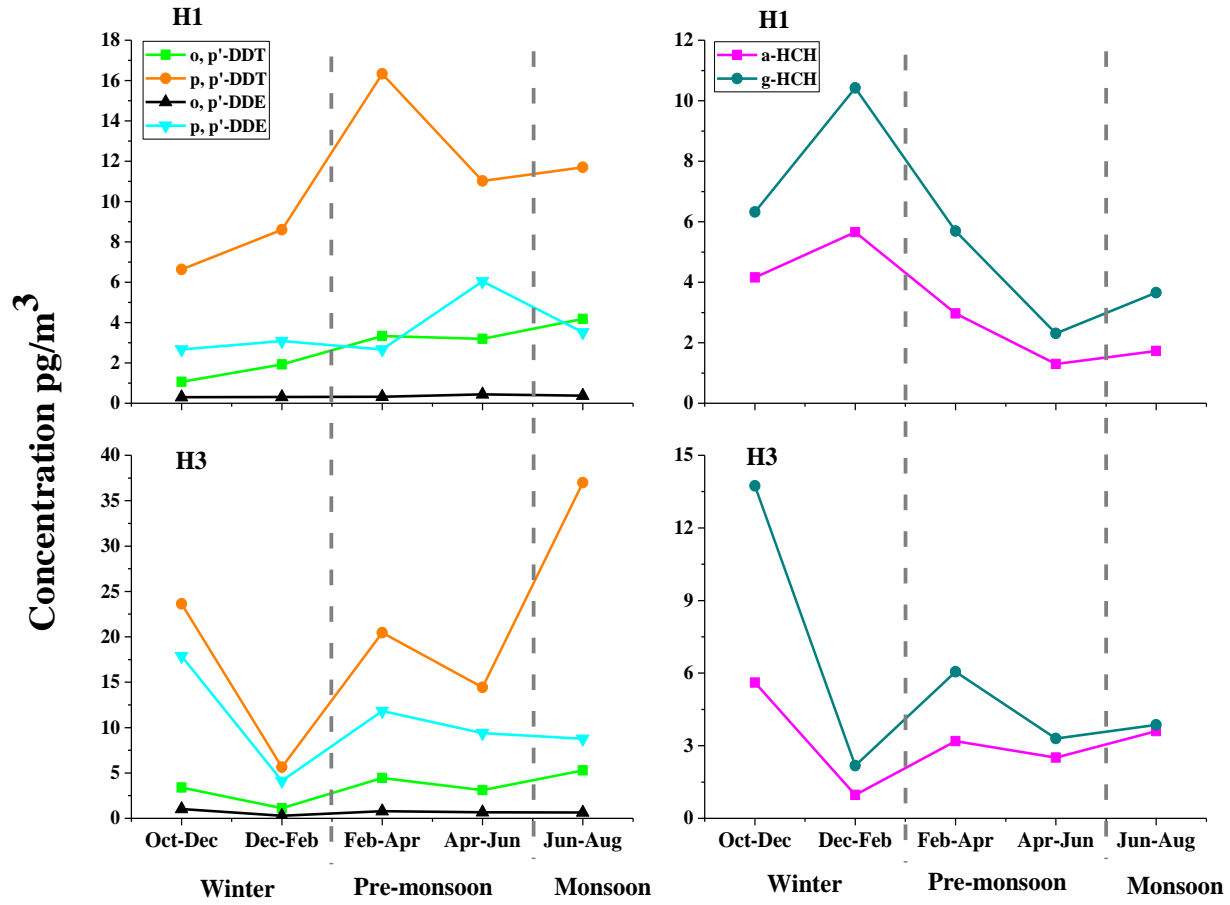

224

225 **Figure SI-11. Seasonality of DDTs and HCHs in Hetauda (H1: Cropland, H3: Industrial area)**

226

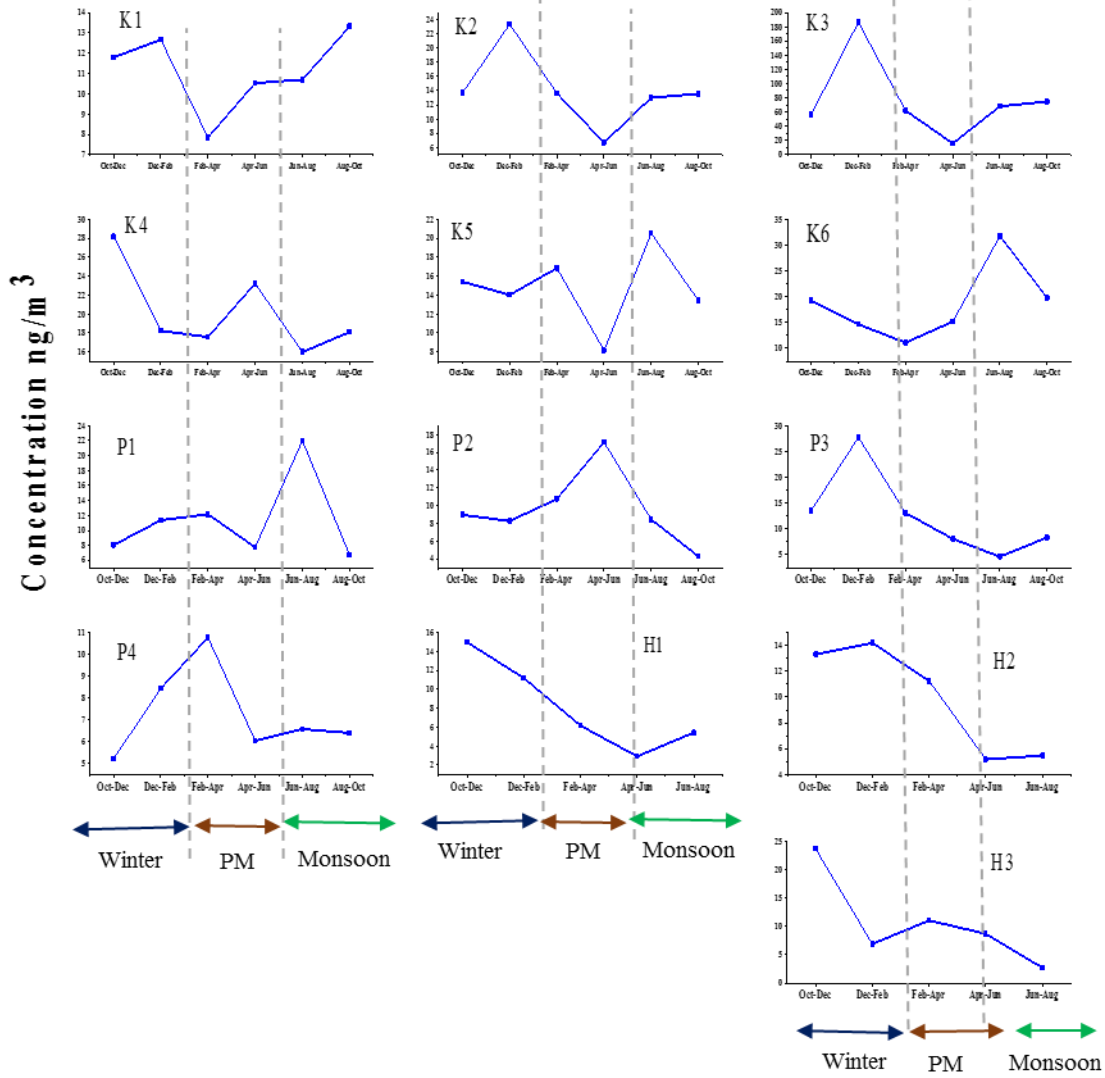

227

228

Figure SI-12. Seasonal variation of HCB in 3 cities of Nepal

229 **Text SI-5. Estimation of loss rate of atmospheric OCPs**

230

231 In the equation,

232 
$$\tau_a = \frac{\ln 2}{K_{degr} + K_{wet} + K_{dry}} \quad (1)$$

233 Where  $\tau_a$  is atmospheric residence time,

234  $K_{degr}$  is photochemical degradation rate in air ( $s^{-1}$ )

235  $K_{wet}$  wet deposition rate ( $s^{-1}$ )

236  $K_{dry}$  dry deposition rate ( $s^{-1}$ )

237 In general, degradation due to OH is considered the dominant process and Bayer et al., 2003 derived a simple  
238 temperature dependent relation to estimate OH concentration i.e. [OH] in atmosphere.

239  
240 
$$[OH] = 0.5 + 0.4 (T - 273.15) \times 10^5 \quad (2)$$

241

242 where  $T$  is absolute temperature (K)

243

244 Then, using the rate constant  $K_{OH}$  (Table SI-12) the degradation rate  $K_{degr}$  is estimated as,

245

246 
$$K_{degr} = K_{OH} [OH] \quad (3)$$

247

248 Assuming the gas phase as dominant form of the pollutants in the atmosphere wet deposition has been estimated  
249 using the relation

250 
$$K_{wet} = \frac{R_i W_G}{h} \quad (4)$$

251 Where  $R_i$  = annual rain intensity ( $mm a^{-1}$ )

252  $W_G$  = gas phase scavenging ratio

253  $h$  = atmospheric boundary layer height (m) and

254 effective gas phase scavenging ratio is estimated as reciprocal of Henry law coefficient

255 
$$W_G = \frac{RT}{H} \quad (5)$$

256 where  $R$  = Gas law constant ( $8.314 Pa m^3 mol^{-1} K^{-1}$ )

257  $T$  = absolute temperature (K)

258  $H$  = Henry's law constant

259 For dry deposition rate the  $K_{dry}$ , has been estimated as

260 
$$K_{dry} = \frac{V_D}{h} \quad (6)$$

261 Where  $V_D$  is dry deposition velocity ( $cm s^{-1}$ )

262 Temperature dependent dry deposition velocity for the gas phase pollutants can be estimated using relation  
263 proposed by González-Gaya et al., 2014

$$\log V_D = -0.261 \log PL - 2.670 \text{ cm s}^{-1}$$

264

265 **Table SI-12. Temperature dependent Henry's law constant and vapor pressure with Rate constant**  
266 **of hydroxyl radical reaction at 25 °C**

267

| Compounds     | $\log H (\text{Pa m}^3 \text{ mol}^{-1})$ | $\log PL (\text{Pa})$ | $K_{OH} (25 \text{ °C}) \text{ cm}^3 \text{ molec}^{-1} \text{ s}^{-1}$ |
|---------------|-------------------------------------------|-----------------------|-------------------------------------------------------------------------|
| p, p'-DDT     | 13.02-3369/T                              | 13.02-4865/T          | $1.5 \times 10^{-12}$                                                   |
| $\alpha$ -HCH | 8.98-1714/T                               | 11.12 - 3497/T        | $1.4 \times 10^{-13}$                                                   |
| $\gamma$ -HCH | 11.58-3049/T                              | 11.98-3905/T          | $1.9 \times 10^{-13}$                                                   |
| HCB           | 11.6-3013/T                               | 11.11-3582/T          | $2.7 \times 10^{-14}$                                                   |

268

269 Parameters about Henry's law constants, OH initiated atmospheric reaction rate and chemical's property data are  
270 found from literatures (Passivirta et al., 1999; Hinckley et al., 1990; Bai et al., 2013; Xiao et al., 2004; Brubaker et  
271 al., 1998; Jautunen et al., 2006)

272

273 **Table SI-13. Calculated values of degradation and deposition rates ( $S^{-1}$ ) based on field temperature and precipitation during**  
 274 **monsoon season**  
 275

|                  |        | $K_{degr}$ |               |               |          | $K_{wet}$ |               |               |          | $K_{dry}$ |               |               |          |
|------------------|--------|------------|---------------|---------------|----------|-----------|---------------|---------------|----------|-----------|---------------|---------------|----------|
|                  | Temp   | p,p'-DDT   | $\gamma$ -HCH | $\alpha$ -HCH | HCB      | p,p'-DDT  | $\gamma$ -HCH | $\alpha$ -HCH | HCB      | p,p'-DDT  | $\gamma$ -HCH | $\alpha$ -HCH | HCB      |
| <b>Kathmandu</b> |        |            |               |               |          |           |               |               |          |           |               |               |          |
| Jan              | 284.15 | 9.66E-08   | 1.22E-08      | 9.02E-09      | 1.74E-09 | 2.48E-08  | 5.12E-08      | 4.08E-10      | 3.65E-08 | 8.38E-07  | 2.06E-07      | 1.45E-07      | 1.75E-07 |
| Feb              | 286.15 | 2.23E-07   | 2.82E-08      | 2.08E-08      | 4.01E-09 | 2.07E-08  | 4.34E-08      | 3.73E-10      | 3.10E-08 | 7.80E-07  | 1.94E-07      | 1.38E-07      | 1.66E-07 |
| Mar              | 290.15 | 8.52E-07   | 1.08E-07      | 7.95E-08      | 1.53E-08 | 1.44E-08  | 3.13E-08      | 3.13E-10      | 2.25E-08 | 6.77E-07  | 1.73E-07      | 1.25E-07      | 1.50E-07 |
| Apr              | 293.15 | 1.92E-06   | 2.43E-07      | 1.79E-07      | 3.46E-08 | 1.11E-08  | 2.47E-08      | 2.75E-10      | 1.78E-08 | 6.11E-07  | 1.60E-07      | 1.16E-07      | 1.39E-07 |
| May              | 295.15 | 3.09E-06   | 3.92E-07      | 2.89E-07      | 5.57E-08 | 9.33E-09  | 2.12E-08      | 2.53E-10      | 1.53E-08 | 5.71E-07  | 1.51E-07      | 1.10E-07      | 1.32E-07 |
| Jun              | 297.15 | 4.78E-06   | 6.05E-07      | 4.46E-07      | 8.60E-08 | 7.87E-09  | 1.82E-08      | 2.32E-10      | 1.31E-08 | 5.34E-07  | 1.43E-07      | 1.05E-07      | 1.26E-07 |
| Jul              | 297.15 | 4.78E-06   | 6.05E-07      | 4.46E-07      | 8.60E-08 | 7.87E-09  | 1.82E-08      | 2.32E-10      | 1.31E-08 | 5.34E-07  | 1.43E-07      | 1.05E-07      | 1.26E-07 |
| Aug              | 297.15 | 4.78E-06   | 6.05E-07      | 4.46E-07      | 8.60E-08 | 7.87E-09  | 1.82E-08      | 2.32E-10      | 1.31E-08 | 5.34E-07  | 1.43E-07      | 1.05E-07      | 1.26E-07 |
| Sep              | 296.15 | 3.86E-06   | 4.89E-07      | 3.60E-07      | 6.95E-08 | 8.57E-09  | 1.96E-08      | 2.42E-10      | 1.41E-08 | 5.52E-07  | 1.47E-07      | 1.08E-07      | 1.29E-07 |
| Oct              | 293.15 | 1.92E-06   | 2.43E-07      | 1.79E-07      | 3.46E-08 | 1.11E-08  | 2.47E-08      | 2.75E-10      | 1.78E-08 | 6.11E-07  | 1.60E-07      | 1.16E-07      | 1.39E-07 |
| Nov              | 289.15 | 6.29E-07   | 7.97E-08      | 5.87E-08      | 1.13E-08 | 1.58E-08  | 3.40E-08      | 3.27E-10      | 2.44E-08 | 7.02E-07  | 1.78E-07      | 1.28E-07      | 1.54E-07 |
| Dec              | 285.15 | 1.49E-07   | 1.89E-08      | 1.39E-08      | 2.69E-09 | 2.27E-08  | 4.71E-08      | 3.90E-10      | 3.36E-08 | 8.08E-07  | 2.00E-07      | 1.42E-07      | 1.71E-07 |
| <b>Pokhara</b>   |        |            |               |               |          |           |               |               |          |           |               |               |          |
| Jan              | 286.15 | 2.23E-07   | 2.82E-08      | 2.08E-08      | 4.01E-09 | 5.56E-08  | 1.17E-07      | 1.00E-09      | 8.34E-08 | 7.80E-07  | 1.94E-07      | 1.38E-07      | 1.66E-07 |
| Feb              | 289.15 | 6.29E-07   | 7.97E-08      | 5.87E-08      | 1.13E-08 | 4.24E-08  | 9.14E-08      | 8.79E-10      | 6.55E-08 | 7.02E-07  | 1.78E-07      | 1.28E-07      | 1.54E-07 |
| Mar              | 293.15 | 1.92E-06   | 2.43E-07      | 1.79E-07      | 3.46E-08 | 2.98E-08  | 6.65E-08      | 7.40E-10      | 4.79E-08 | 6.11E-07  | 1.60E-07      | 1.16E-07      | 1.39E-07 |
| Apr              | 296.15 | 3.86E-06   | 4.89E-07      | 3.60E-07      | 6.95E-08 | 2.31E-08  | 5.27E-08      | 6.52E-10      | 3.81E-08 | 5.52E-07  | 1.47E-07      | 1.08E-07      | 1.29E-07 |
| May              | 297.15 | 4.78E-06   | 6.05E-07      | 4.46E-07      | 8.60E-08 | 2.12E-08  | 4.89E-08      | 6.26E-10      | 3.53E-08 | 5.34E-07  | 1.43E-07      | 1.05E-07      | 1.26E-07 |

|     |        |          |          |          |          |          |          |          |          |          |          |          |          |
|-----|--------|----------|----------|----------|----------|----------|----------|----------|----------|----------|----------|----------|----------|
| Jun | 299.15 | 7.13E-06 | 9.03E-07 | 6.65E-07 | 1.28E-07 | 1.79E-08 | 4.20E-08 | 5.76E-10 | 3.04E-08 | 5.00E-07 | 1.36E-07 | 1.00E-07 | 1.20E-07 |
| Jul | 299.15 | 7.13E-06 | 9.03E-07 | 6.65E-07 | 1.28E-07 | 1.79E-08 | 4.20E-08 | 5.76E-10 | 3.04E-08 | 5.00E-07 | 1.36E-07 | 1.00E-07 | 1.20E-07 |
| Aug | 299.15 | 7.13E-06 | 9.03E-07 | 6.65E-07 | 1.28E-07 | 1.79E-08 | 4.20E-08 | 5.76E-10 | 3.04E-08 | 5.00E-07 | 1.36E-07 | 1.00E-07 | 1.20E-07 |
| Sep | 298.15 | 5.86E-06 | 7.42E-07 | 5.47E-07 | 1.05E-07 | 1.95E-08 | 4.53E-08 | 6.00E-10 | 3.28E-08 | 5.17E-07 | 1.39E-07 | 1.03E-07 | 1.23E-07 |
| Oct | 295.15 | 3.09E-06 | 3.92E-07 | 2.89E-07 | 5.57E-08 | 2.51E-08 | 5.70E-08 | 6.80E-10 | 4.11E-08 | 5.71E-07 | 1.51E-07 | 1.10E-07 | 1.32E-07 |
| Nov | 291.15 | 1.13E-06 | 1.44E-07 | 1.06E-07 | 2.04E-08 | 3.55E-08 | 7.79E-08 | 8.06E-10 | 5.60E-08 | 6.54E-07 | 1.69E-07 | 1.22E-07 | 1.46E-07 |
| Dec | 287.15 | 3.23E-07 | 4.09E-08 | 3.01E-08 | 5.81E-09 | 5.08E-08 | 1.08E-07 | 9.60E-10 | 7.69E-08 | 7.53E-07 | 1.89E-07 | 1.35E-07 | 1.62E-07 |

**Hetauda**

|     |        |          |          |          |          |          |          |          |          |          |          |          |          |
|-----|--------|----------|----------|----------|----------|----------|----------|----------|----------|----------|----------|----------|----------|
| Jan | 288.15 | 4.56E-07 | 5.77E-08 | 4.25E-08 | 8.20E-09 | 2.68E-08 | 5.71E-08 | 5.30E-10 | 4.09E-08 | 7.27E-07 | 1.83E-07 | 1.31E-07 | 1.58E-07 |
| Feb | 290.15 | 8.52E-07 | 1.08E-07 | 7.95E-08 | 1.53E-08 | 2.24E-08 | 4.86E-08 | 4.85E-10 | 3.49E-08 | 6.77E-07 | 1.73E-07 | 1.25E-07 | 1.50E-07 |
| Mar | 294.15 | 2.45E-06 | 3.10E-07 | 2.29E-07 | 4.41E-08 | 1.58E-08 | 3.55E-08 | 4.09E-10 | 2.56E-08 | 5.91E-07 | 1.55E-07 | 1.13E-07 | 1.35E-07 |
| Apr | 299.15 | 7.13E-06 | 9.03E-07 | 6.65E-07 | 1.28E-07 | 1.03E-08 | 2.42E-08 | 3.32E-10 | 1.75E-08 | 5.00E-07 | 1.36E-07 | 1.00E-07 | 1.20E-07 |
| May | 301.15 | 1.03E-05 | 1.31E-06 | 9.64E-07 | 1.86E-07 | 8.75E-09 | 2.09E-08 | 3.06E-10 | 1.51E-08 | 4.69E-07 | 1.29E-07 | 9.58E-08 | 1.14E-07 |
| Jun | 301.15 | 1.03E-05 | 1.31E-06 | 9.64E-07 | 1.86E-07 | 8.75E-09 | 2.09E-08 | 3.06E-10 | 1.51E-08 | 4.69E-07 | 1.29E-07 | 9.58E-08 | 1.14E-07 |
| Jul | 300.15 | 8.61E-06 | 1.09E-06 | 8.04E-07 | 1.55E-07 | 9.50E-09 | 2.25E-08 | 3.19E-10 | 1.63E-08 | 4.84E-07 | 1.32E-07 | 9.80E-08 | 1.17E-07 |
| Aug | 300.15 | 8.61E-06 | 1.09E-06 | 8.04E-07 | 1.55E-07 | 9.50E-09 | 2.25E-08 | 3.19E-10 | 1.63E-08 | 4.84E-07 | 1.32E-07 | 9.80E-08 | 1.17E-07 |
| Sep | 299.15 | 7.13E-06 | 9.03E-07 | 6.65E-07 | 1.28E-07 | 1.03E-08 | 2.42E-08 | 3.32E-10 | 1.75E-08 | 5.00E-07 | 1.36E-07 | 1.00E-07 | 1.20E-07 |
| Oct | 298.15 | 5.86E-06 | 7.42E-07 | 5.47E-07 | 1.05E-07 | 1.12E-08 | 2.61E-08 | 3.46E-10 | 1.89E-08 | 5.17E-07 | 1.39E-07 | 1.03E-07 | 1.23E-07 |
| Nov | 293.15 | 1.92E-06 | 2.43E-07 | 1.79E-07 | 3.46E-08 | 1.72E-08 | 3.84E-08 | 4.27E-10 | 2.76E-08 | 6.11E-07 | 1.60E-07 | 1.16E-07 | 1.39E-07 |
| Dec | 288.15 | 4.56E-07 | 5.77E-08 | 4.25E-08 | 8.20E-09 | 2.68E-08 | 5.71E-08 | 5.30E-10 | 4.09E-08 | 7.27E-07 | 1.83E-07 | 1.31E-07 | 1.58E-07 |

277 **Table SI-14. Comparison of characteristic travel distance (CTD, km) in current study areas**  
 278 **with global and other specified regions**  
 279

| This study (km) |           |         |         |         | Previous studies |         |             |                |           |
|-----------------|-----------|---------|---------|---------|------------------|---------|-------------|----------------|-----------|
|                 | Kathmandu | Pokhara | Hetauda | average | *Global          | *Global | East &      |                | South     |
|                 |           |         |         |         | (a)              | (b)     | south china | Indian Ocean** | Atlantic* |
| HCB             | 11836     | 9834    | 9984    | 10551   | 10600            | 144304  | 13306       | 345            | 907       |
| $\alpha$ -HCH   | 9346      | 7536    | 6250    | 7710    | 17946            | 22307   | 3629        | 605            | 484       |
| $\gamma$ -HCH   | 6016      | 4387    | 4035    | 4812    | 9732             | 22572   | 3024        | 544            | 363       |
| p, p' - DDT     | 1269      | 956     | 776     | 1000    | 1045             | 1462    | 1331        | 774            |           |

\*Shen et al., 2005 (a : estimation by TaPL3 model; b: estimation by ELPOS)

\*\* Gioia et al., 2012

280

281

282 **Text SI-6 Uncertainties of CTD**

283 Given soil can absorb atmospheric POPs, it may retard the transport of POPs. Previous study had  
284 investigated the air-soil exchange of POPs along south slope of Nepal Himalaya mountain, and the  
285 results found volatile compounds such as HCB, PCBs and HCHs reached air-soil exchange  
286 equilibrium in low elevation cities (Gong et al., 2014). This means for the volatile compounds, only  
287 the atmospheric processes (i.e. OH degradation and dry/wet deposition) are major loss process. Due  
288 to the possible overestimation of OH concentration reported by Anderson et al. (1996),  $\tau_a$  will be  
289 underestimated and then CTD will be underestimated. With respect to less volatile compounds such  
290 as DDTs, their air-soil exchange showed deposition trend (Gong et al., 2014), suggesting soil  
291 absorption should not be ignored. As this will reduced  $\tau_a$  of DDTs, and lead to the overestimation of  
292 CTD.

293 **Text SI-7 Generation of forward trajectories**

295 NOAA's HYSPLIT model and the NCEP/NCAR Global Reanalysis data set for Kathmandu were  
296 used to calculate forward trajectories. Forward trajectories were traced for 3 days at 6 h intervals at  
297 100 m above sea level. All 416 trajectories were grouped into 5 clusters. Sixty percent of trajectories  
298 (sum of cluster 1, 2 and 3) move northward, crossing the Himalaya and reaching southeastern  
299 Tibetan Plateau.

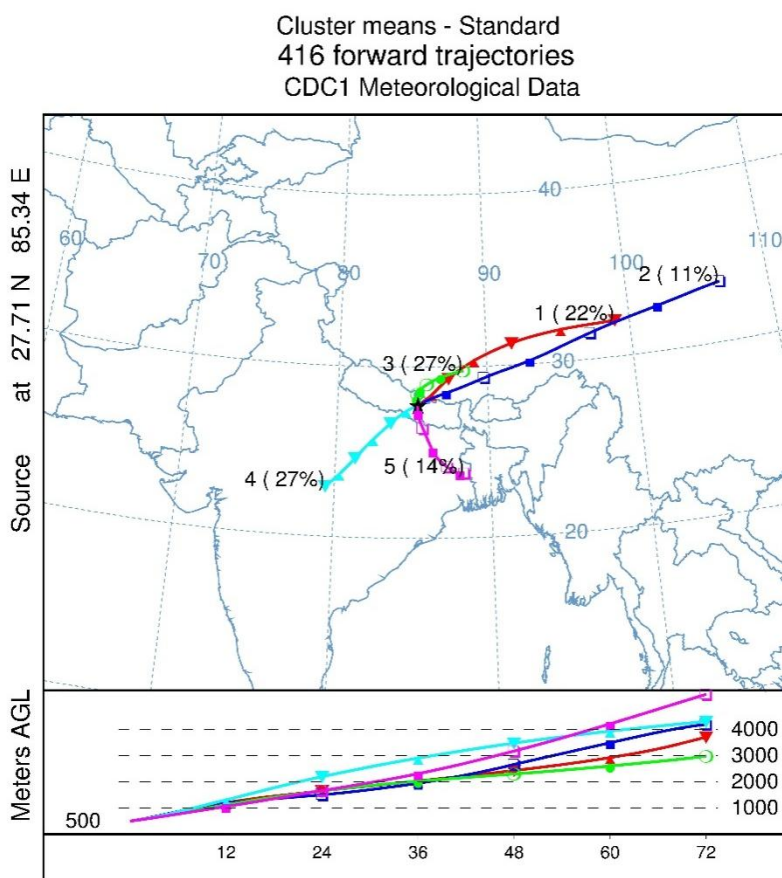

300  
301 **Figure SI-13. Clusters of forward trajectories for Kathmandu**



302 **References:**

- 303 Anderson, P. N.; Hites., R. A. OH radical reactions: The major removal pathway for polychlorinated biphenyls from  
304 the atmosphere. *Environ. Sci. Technol.* **1996**, 30, 1757–1763
- 305 Bai, J.; Yang, W.; Zhang, C.; Zhao, Y.; Gong, C.; Sun, X.; Zhang, Q.; Wang, W. Theoretical study on the OH-  
306 initiated atmospheric reaction of 1,1,1-trichloro-2,2-bis(4-chlorophenyl) ethane (DDT). *Atmos. Environ.* **2013**,  
307 67, 177–183.
- 308 Beyer, A.; Wania, F.; Gouin, T.; Mackay, D.; Matthies, M. Temperature dependence of the characteristic travel  
309 distance. *Environ. Sci. Technol.* **2003**, 37 (4), 766–771.
- 310 Brubaker, W. W.; Hites, R. A. OH Reaction Kinetics of Gas-Phase  $\alpha$ - and  $\gamma$ -Hexachlorocyclohexane and  
311 Hexachlorobenzene. *Environ. Sci. Technol.* **1998**, 32 (6), 766–769.
- 312 Gioia, R.; Li, J.; Schuster, J.; Zhang, Y.; Zhang, G.; Li, X.; Spiro, B.; Bhatia, R. S.; Dachs, J.; Jones, K.C. Factors  
313 Affecting the Occurrence and Transport of Atmospheric Organochlorines in the China Sea and the Northern  
314 Indian and South East Atlantic Oceans. *Environ. Sci. Technol.* **2012**, 46, 10012–10021
- 315 Gong, P.; Wang, X.; Li, S.; Yu, W.; Li, J.; Kattel, D. B.; Wang, W.; Deykota, L. P.; Yao, T.D.; Joswiak, D. R.  
316 Atmospheric transport and accumulation of organochlorine compounds on the southern slopes of the  
317 Himalayas, Nepal *Environ. Pollut.* **2014**, 192, 44-51.
- 318 González-Gaya, B.; Zúñiga-Rival, J.; Ojeda, M. J.; Jiménez, B.; Dachs, J. Field measurements of the atmospheric dry  
319 deposition fluxes and velocities of polycyclic aromatic hydrocarbons to the global oceans. *Environ. Sci.*  
320 *Technol.* **2014**, 48 (10), 5583–5592.
- 321 Harner, T.; Shoeib, M.; Diamond, M. L.; Stern, G.; Rosenberg, B. Using passive air samplers to assess urban-rural  
322 trends for persistent organic pollutants. 1. Polychlorinated biphenyls and organochlorine pesticides. *Environ.*  
323 *Sci. Technol.* **2004**, 38 (17), 4474–4483.
- 324 Harner, T.; Bartkow, M.; Holoubek, I.; Klanova, J.; Wania, F.; Gioia, R.; Moeckel, C.; Sweetman, A. J.; Jones, K. C.  
325 Passive air sampling for persistent organic pollutants : Introductory remarks to the special issue. *Environ.*  
326 *Pollut.* **2006**, 144, 361–364
- 327 Hinckley, D.; TF, B.; ForemanWT; JR., T. Determination of vapor pressures for nonpolar and semipolar organic  
328 compounds from gas chromatographic retention data. *J Chem Eng Data* **1990**, 35, 232–237.
- 329 Jantunen, L. M.; Bidleman, T. F. Henry's law constants for hexachlorobenzene, p,p'-DDE and components of  
330 technical chlordane and estimates of gas exchange for Lake Ontario. *Chemosphere* **2006**, 62 (10), 1689–1696.
- 331 Moeckel, C.; Harner, T.; Nizzetto, L.; Strandberg, B.; Lindroth, A.; Jones, K. C. Use of depuration compounds in  
332 passive air samplers: Results from active sampling-supported field deployment, potential uses, and  
333 recommendations. *Environ. Sci. Technol.* **2009**, 43 (9), 3227–3232.
- 334 Paasivirta, J.; Sinkkonen, S.; Mikkelsen, P.; Rantio, T.; Wania, F. Estimation of vapor pressures, solubilities and  
335 Henry's law constants of selected persistent organic pollutants as functions of temperature. *Chemosphere*  
336 **1999**, 39 (5), 811–832.
- 337 Pozo, K.; Harner, T.; Wania, F.; Muir, D. C. G.; Jones, K. C.; Barrie, L. a. Toward a global network for persistent  
338 organic pollutants in air: Results from the GAPS study. *Environ. Sci. Technol.* **2006**, 40 (16), 4867–4873.
- 339 Pozo, K.; Harner, T.; Lee, S. C.; Wania, F.; Muir, D. C. G.; Jones, K. C. Seasonally Resolved Concentrations of  
340 Persistent Organic Pollutants in the Global Atmosphere from the First Year of the GAPS Study. *Environ. Sci.*  
341 *Technol.* **2009**, 43 (3), 796–803.

- 342 Sheng, L.; Wania, F.; Lei, Y.; Muir D.C.G.; Teixeira, C.; Bidleman, T.F. Atmospheric Distribution and Long-Range  
343 Transport Behavior of Organochlorine Pesticides in North America. *Environ. Sci. Technol.* **2005**, 39, 409-420
- 344 Shoeib, M; Haner, T. Characterization and comparison of three passive air samplers for persistent organic pollutants.  
345 *Environ Dci. Technol.* **2002**, 36, 4142-4151
- 346 Xiao, H.; Li, N.; Wania, F. Compilation , Evaluation , and Selection of Physical-Chemical Property Data for  $\alpha$  - , $\beta$  - ,  
347  $\gamma$ - Hexachlorocyclohexane. *J. Chem. Eng. Data* **2004**, 49, 173-185
- 348 Wong, F.; Alegria, H. a; Bidleman, T. F.; Alvarado, V.; Angeles, F.; Galarza, A. a; Bandala, E. R.; De, I.; Hinojosa,  
349 C.; Estrada, G.; et al. Passive Air Sampling of Organochlorine Pesticides in Mexico. *Environ. Sci.*  
350 *Technol.***2009**, 43 (3), 704–710.
- 351
