# Supplementary material for: Atmospheric organochlorine pesticides and polychlorinated biphenyls in urban areas of Nepal: spatial variation, sources, temporal trends and long range transport potential
Source: Copernicus journal article supplement (doi:10.5194/acp-2017-448), 2017-05-19
Supplement: Supplementary file [file acp-2017-448-AC3-supplement.pdf]

## **Response to SC2**

The authors thank SC2 (Dr. I.C. Yadav) for his inspiring comments. All the comments are addressed point-by-point below.

**Comment 1** In my opinion, Hetauda is not an agricultural city; rather it is an industrial estate with a number of medium and small-scale industries particularly cement industries. on what basis author called it as agricultural cities. If you have a reference, plz cite them.

**Response:** The primary objective of our work was to assess the atmospheric level of various POPs in different land types, and to find the probable source area and to identify seasonalities of POPs. We did not aim to classify the city. We agree that Hetauda could be considered as an industrial city before 1990, since all the industries were full-functional. But after 1990, most of the industries are non-functional (e.g. Hetauda textile industry), either due to national policies or due to heavy power cut-off (up to 17h per day). At present, the industries in Hetauda are run for limited production e.g. (Hetauda cement factory ~60%). Rather, Hetauda is mostly surrounded by agriculture land and forest where use of OCPs could be the possible emission source. Hetauda is the headquarter of Makawanpur district, the vegetable products of this district are sold in the surrounding markets, including even the capital city. Additionally, according to “statistical information on Nepalese agriculture 2070-2073” , district of agro-production capacity (crops and vegetables) has been increased gradually. Given the industrial activities became shrinking and agricultural activities are growing, we prefer to regard Hetauda as an “agriculture city”.

Source: Government of Nepal Ministry of Agricultural Development (2014). Retrieved from: <http://www.moad.gov.np/en/publication>

**Comment 2** What recovery standard and in what amount was used in this study?

**Response:** We used 20 $\mu$ l 1,2,3,5-tetrachloro-4,6-dimethylbenzene with the concentration of 100 pg  $\mu$ l<sup>-1</sup> as recovery standard. Please see manuscript p. 5, lines 134-135.

**Comment 3** The climate data such as precipitation and temperature need a reference.

**Response:** Thank you for your concern on the figure for the monthly climate variations. For this figure, we obtained the data from Department of Hydrology and Meteorology (DHM), Nepal. The figures are now provided with proper reference. Please refer p. 6 lines 59-60 in supporting information. This has been acknowledged in the manuscript. Please see p. 16, lines 456-457.

**Comment 4** L75-76 in the supplement, is not clear as what amount of international standard was used. Also, PCB-209 may not be appropriate standard because PCB-209 can be detected in urban environmental samples, especially due to the emissions from pigments and dyes where it is present as a by-product (Anezaki and Nakano, Environ Sci Pollut Res (2014) 21:998-1009). Hence, <sup>13</sup>C-PCB-141 isotope labelled internal standard is most appropriate standard that compensates for errors and losses throughout the procedures.

**Response:** We don't know what does the "international standard" mean, do you mean "internal standard"? If you mean "internal standard", we used pentachloronitrobenzene (10 ng) and PCB-209 (2 ng) as the internal standard. There are several studies which used PCB-209 as recovery standard (e.g. Chakraborty et al., 2015; Wang et al., 2016; Yadav et al., 2017). If a chemical can be used as recovery standard, it can generally be used as internal standard. We double checked the peak area of PCB-209 in the samples and QC solution (mixture of recovery and internal standard, but with the same concentration as real sample), we found peak area of PCB 209 in samples is very close to that found in QC, which implies our GC-MS is stable and no additional PCB-209 come from atmosphere to sample.

We appreciate your suggestion but internal standard can only indicate the fluctuations of instrument only recovery standard can be used to evaluate the errors and losses throughout the clean-up procedures!

#### References

Chakraborty, P., Zhang, G., Li, J., Sivakumar, A. and Jones, K. C.: Occurrence and sources of selected organochlorine pesticides in the soil of seven major Indian cities: Assessment of air-soil exchange., Environ. Pollut., 204, 74-80,

doi:10.1016/j.envpol.2015.04.006, 2015.

Wang, W., Wang, Y., Zhang, R., Wang, S., Wei, C., Chaemfa, C., Li, J., Zhang, G. and Yu, K.: Seasonal characteristics and current sources of OCPs and PCBs and enantiomeric signatures of chiral OCPs in the atmosphere of Vietnam, *Sci. Total Environ.*, 542, 777–786, doi:10.1016/j.scitotenv.2015.10.129, 2016.

Yadav, I. C., Devi, N. L., Li, J., Zhang, G. and Breivik, K.: Possible emissions of POPs in plain and hilly areas of Nepal: Implications for source apportionment and health risk assessment, *Environ. Pollut.*, 220, 1289–1300, doi:10.1016/j.envpol.2016.10.102, 2017.

**Comment 5** Why DDT is low in Hetauda despite being warmer and agricultural city? Any idea?

**Response:** In fact, the result was opposite to our expectation. Diminished use of technical DDT can be the likely reason behind the quantity observed in Hetauda. However, we have no accurate reason to explain the lower concentration of DDT in Hetauda. This deserves a future research.

**Comment 6** In Fig 3, How do you interpret the concentration of HCB at the industrial site (K3), why it is so high?

**Response:** The fuel combustion in thermal power plants for industrial purpose during the dry season when there was a severe crisis of electricity from national grid might be the possible cause of high atmospheric HCB in an industrial area (K3). Besides pesticides and byproduct of industrial reactions, fuel combustion is another important cause of HCB emission into the atmosphere (Wang et al., 2010). Bailey (2001) has estimated that ~ 30% of total global emission of HCB comes from combustion. Please see p. 12, lines 321-322.

#### References

Bailey, R. E.: Global hexachlorobenzene emissions, *Chemosphere*, 43(2), 167–182, doi:10.1016/S0045-6535(00)00186-7, 2001.

Wang, G., Lu, Y., Han, J., Luo, W., Shi, Y., Wang, T. and Sun, Y.: Hexachlorobenzene sources, levels and human exposure in the environment of China., *Environ. Int.*, 36(1), 122–30, doi:10.1016/j.envint.2009.08.005, 2010.

**Comment 7** Why authors only compare and discuss their finding with past studies from India and abroad but not with the past studies of the same region. Although not many studies done in this region, but few studies are well reported (eg. Yadav et al.,

2016, Guzzella et al., 2016; Guzzella et al., 2011; Gong et al., 2014, Cizmas et al., 2015 and so on) that should be consulted to discuss the finding of present data.

**Response:** The main objective of the paper was to assess the source area and strength, however, we compare the present study outcomes with India and abroad because these areas have similar climate as the present study area. Regarding the data reported for Nepal cities, they were compared in supporting information (Table SI-7, p 21).

**Comment 8** Another important concern for me is that author did monitoring of PAS for 1 year, however they compared and discussed their data with previous international studies that were based on short-term monitoring of PAS.

**Response:** We got the concentrations of POPs from one-year monitoring. We tried our best to find the studies which were similar to ours (with 1 year sampling period), but we did not obtain. So, we have to use our values to compare with the concentration data which were from the region of similar climate though they were the results of short-term study.

**Comment 9** Table 1 should also include past studies of the same region to better discuss your finding.

**Response:** Thank you for your suggestion. We are sorry to say, due the size limitation of the table 1 we are unable to include values from the previous works, instead they are presented in the Table SI-7. Please see p. 21, supplementary materials.
